# Supplementary material for: Transcriptome and Co-Expression Network Analysis Reveals the Molecular Mechanism of Rice Root Systems in Response to Low-Nitrogen Conditions
Source: MDPI journal article supplement (doi:10.3390/ijms24065290), 2023-03-09
Supplement: s1 [file s1]

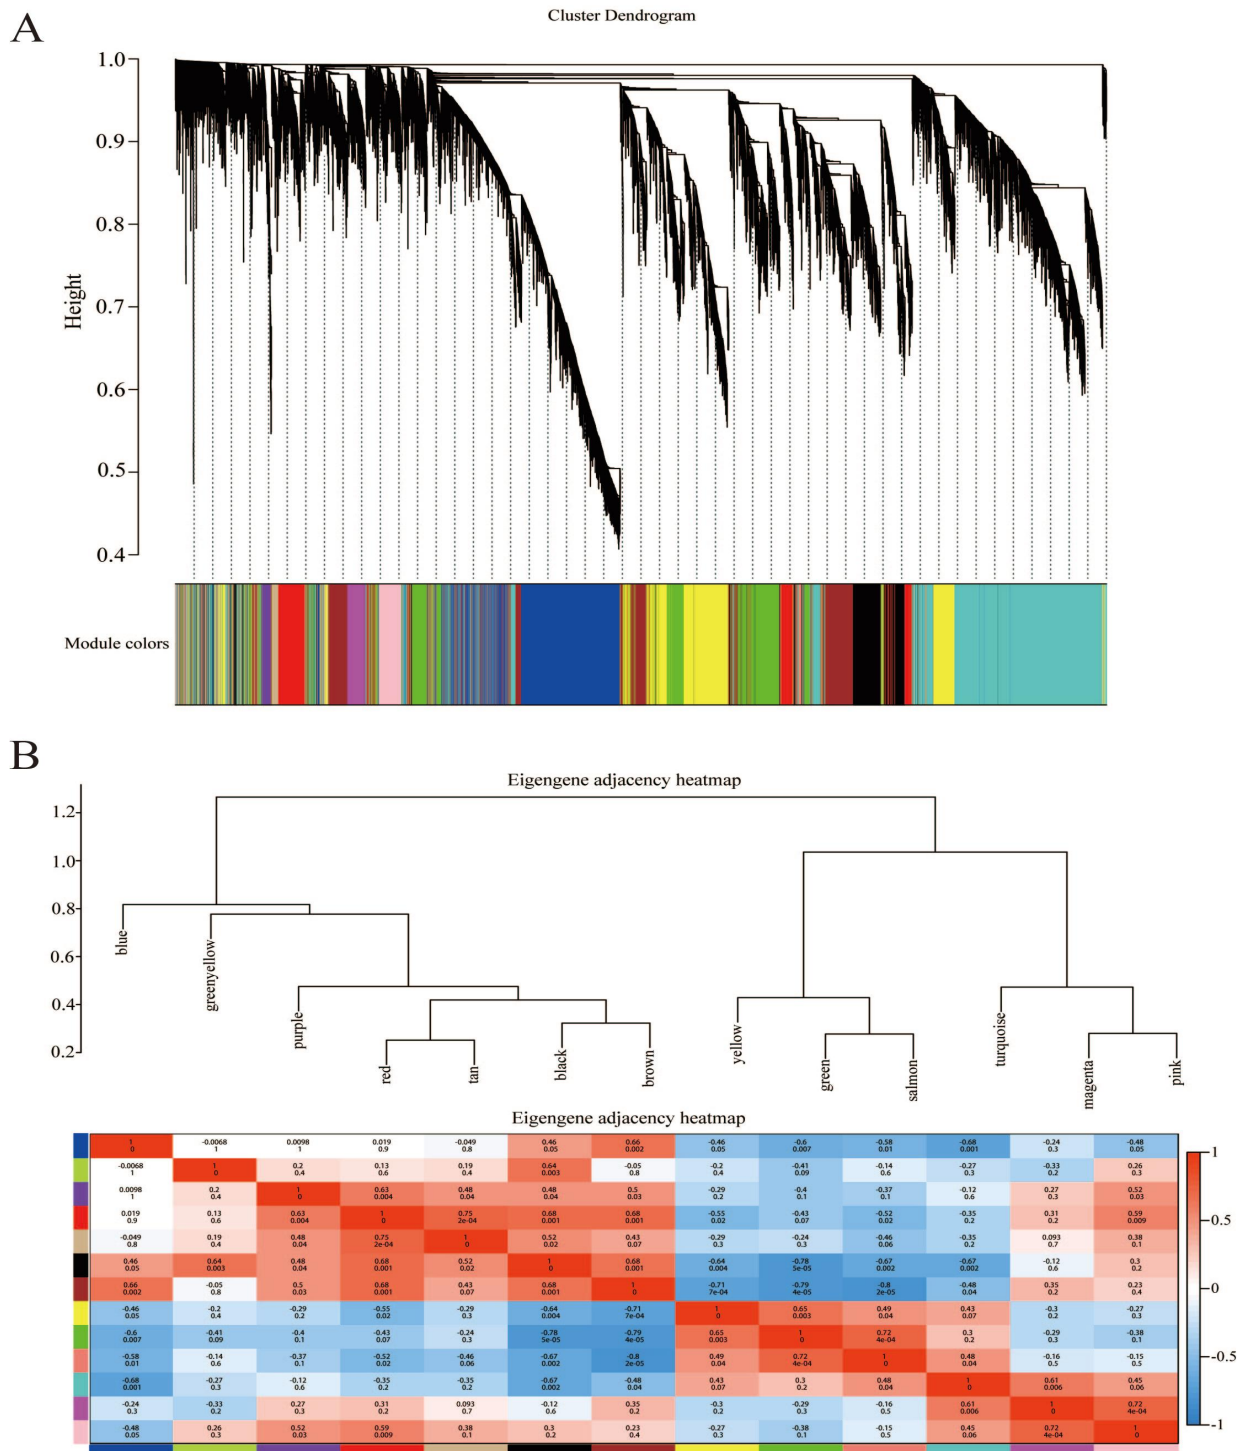

Figure S1. Weighted correlation network analysis of rice roots response to low nitrogen. (A):Dendrogram of gene cluster. (B): Unsupervised hierarchical clustering dendrograms and heat maps. Colorcoded modules are branches of the clustering tree.
