# Supplementary material for: Transcriptome and Co-Expression Network Analysis Reveals the Molecular Mechanism of Rice Root Systems in Response to Low-Nitrogen Conditions
Source: MDPI journal article supplement (doi:10.3390/ijms24065290), 2023-03-09
Supplement: s1 [file s1]

**Supplementary Table S9 Fluorescent quantitative primers**

| Gene ID      | Upstream primers (5'-3')      | Downstream primers (5'-3')     |
|--------------|-------------------------------|--------------------------------|
| <i>Actin</i> | ACCATTGGTGCTGAGCGTTT          | CGCAGCTTCCATTTCCTATGAA         |
| Os01g0944100 | CGATCTCCTCCTTCGTAGTTC         | CGAGTAGAAGAGCTTATCTCCG         |
| Os01g0965900 | GACAAGAAGCCTCTCAAGAACA        | TTATACGGGTAGCGAGATTGTC         |
| Os02g0734400 | CGTTTTCCATTACGAATTTGCG        | GAGGTAACAACCTCCAAATCCGA        |
| Os03g0195800 | TCTTCTACAAGTTACACGACCC        | GAAGTAGATAGCTGAGTCCACC         |
| Os03g0282100 | CTACTGGATATGGCTGCACTAC        | CTGTTTCAGTTCCAACCCCAT          |
| Os03g0305400 | CTTTAGTTCGCTTCGCATGTAA        | GGTTAGCGCGAATAGATCAAAG         |
| Os03g0341000 | GGTGGAGTACAGCGTTAATGA         | CCTTAATCTCCACGGTAAGACA         |
| Os03g0426300 | TTGATCCGTCAATGGTGAGAC         | CTTGTTTCAGCCATGAGGAGTC         |
| Os03g0654900 | TCTGCCTGTCAGAGCTGA            | ACGACCTAAGAAATCACGGAAT         |
| Os03g0701400 | GACACGTCGAGCCTACATTAG         | CTGAAATTGTTTGGCTGAGCTC         |
| Os03g0766600 | GAATCTGAACCTGGTGATTTTCG       | TTCACCTCGAATCGTCTCATGAT        |
| Os04g0120300 | TAATGACAAGTTTGTGGCACAG        | CGTTGCCTTGGTGATGTTATAG         |
| Os04g0142400 | GCAAATGGGAGACAAGAACTT         | TTTGTATCGATCCATTTTCGCC         |
| Os04g0475600 | GTACAGGGAGTTCAAGTACGAC        | GGCCTAATGGACATTCTAGTCA         |
| Os04g0476000 | TGTGGTATTAACTTTGTGCGG         | GCATTCACAAGGGAAAGTGATT         |
| Os04g0481800 | ACTCCTAGTTTGATTACGACGG        | TCTGTAGCTCCAAATCTAACGA         |
| Os04g0585900 | CAACAATAAACTGGAAGCCGT         | CTCCTTGGGCACTTAGATTTTG         |
| Os04g0619000 | GTGATGGCAGATGCGTATATTG        | TCTTTCTTCAGGTTATGCGACT         |
| Os04g0632100 | CATGTGTTCAAGATGACCCAAC        | TAGTTCCATAGACCCTAGCTGT         |
| Os04g0674400 | TGATGATAGAAGGGAACATCGG        | TAAGTTGCAGTTACCCTAGCAA         |
| Os05g0145100 | CGAATAATTCAGTTCGTGCCAA        | TCATGCAACCTTGTACAATTGG         |
| Os05g0434800 | ACAAAGATCACTGTGACCGATA        | GTGACTAACCATGACATGACAG         |
| Os06g0177000 | GACATCACCACCAAGATCCACC<br>ACA | TCCTGCTCCTTG TAGTACATTGC<br>GT |
| Os06g0522300 | GGAGTTCACGGAGAGTTACTAC        | GTAGCGTTCAGAAGGATGGAG          |
| Os06g0662550 | CCACCTACTCTCCTAGAACCTA        | GCTAGTATTAGCTGGTGGTAGG         |
| Os07g0190800 | TCAGCTCACTGTAACAAGATGG        | GAAGTCTATCACCACCAGCTTT         |
| Os08g0428100 | CTGGTGTTTGATTGTACAAGGG        | TCTGGACCATCACTTAAAAGCT         |
| Os08g0480400 | TTCGAGTCAAGTCGTACGATTG        | GATGTCGTTGAAGTAGGTGGA          |
| Os08g0533300 | TGACCATAAAAAGGGCCTACAT        | TCAATTCTGTCAATGACTTGGC         |
| Os09g0339000 | GTACAGGTAGCACGTTCTCAG         | TATCAACCAACAAATGATCCGG         |
| Os09g0471000 | AAGGAAGAGTGGTTTAGCCC          | GATGGGAATGTCGGAGAAGTAG         |
| Os09g0501100 | AGGAGAACCTGGACGCCAA           | ATCATACGAACGCCAAGAAACC         |
| Os10g0407200 | AGTGTTTCGATTTAATGCGAGTG       | CGAAAACACCTACGAATCCTTC         |
| Os11g0160300 | GACACTAACAGAAGGACGGTTA        | CCTTTTTGTGCTTTGTACGGTA         |
| Os11g0164200 | CGGAATCAACAGCATAAGTGAG        | GTGAAGCTCGTGGTAGATCTG          |
| Os11g0602750 | TTGTTTAGGTTTTTCACGCCTTC       | AAACAATGCCATCGATAACCATG        |
| Os12g0134900 | TGCCGCTGAATGGTACTATAAT        | AATCATTTTTCTGCCGCTGTAG         |
| Os12g0154800 | GATCAATGTGATGAAACTCGCA        | GAAGAGCTTGTTTTCTCCGTTT         |
| Os12g0154900 | AATGTGATGAAACTTGACGGTC        | GAAGAGCTTGTTTTCTCCGTTT         |
| Os12g0236400 | CTCCACTTGGGATTAAGGCTAA        | ACCTTTCTGGCATGAAGTTTTTC        |

|              |                        |                          |
|--------------|------------------------|--------------------------|
| Os12g0410150 | GAAGGGTATATCCAGTGAGGTG | AGCTGAATTTTCATGGTTGTGTC  |
| Os12g0478200 | TGTGGCTGTGTTTCATTACTTG | ATACATGCCAACAACACTAGGAGG |
| Os12g0594000 | AGGGCAACATGTACATGAGTAG | AACAAATCGAAAAATACGCCGC   |

---
