# Supplementary material for: Transcriptome and Co-Expression Network Analysis Reveals the Molecular Mechanism of Rice Root Systems in Response to Low-Nitrogen Conditions
Source: Int J Mol Sci. 2023 Mar 9;24(6):5290. doi: 10.3390/ijms24065290 (PMC10048922; doi:10.3390/ijms24065290)
Supplement: Supplementary file 1 [file ijms-24-05290-s001.zip]

Archive with 12 entries (12 files):
- Captions.pdf
- Supplementary Figure S1.pdf
- Supplementary Figure S2.pdf
- Supplementary Table S1.xlsx
- Supplementary Table S2.xlsx
- Supplementary Table S3.xlsx
- Supplementary Table S4.xlsx
- Supplementary Table S5.xlsx
- Supplementary Table S6.xlsx
- Supplementary Table S7.xlsx
- Supplementary Table S8.xlsx
- Supplementary Table S9.pdf
