# Supplementary material for: Transcriptome and Co-Expression Network Analysis Reveals the Molecular Mechanism of Rice Root Systems in Response to Low-Nitrogen Conditions
Source: Int J Mol Sci. 2023 Mar 9;24(6):5290. doi: 10.3390/ijms24065290 (PMC10048922; doi:10.3390/ijms24065290)
Supplement: Supplementary file 1 [file ijms-24-05290-s001.zip › Supplementary Table S1.xlsx]

## Sheet: All.sample.summary
Supplementary Table S1. Summary of read data, cleaning data, percentage of Q30, percentage of GC number, and mapping rate for different samples.
Sample	Raw Reads	Clean Reads	Clean Base(G)	Q30(%)	GC Content(%)	Reads mapped
LN-1d-1	84350238	81001666	12.15	91.51	52.88	73062629(90.31%)
LN-1d-2	87997248	82923272	12.44	91.43	52.8	58150107(90.08%)
LN-1d-3	78945864	74619274	11.19	92.05	52.55	61851655(89.69%)
CK-1d-1	85504596	80898642	12.13	91.31	53.06	56399204(91.41%)
CK-1d-2	68613508	64555492	9.68	91.98	52.84	84118342(92.13%)
CK-1d-3	73053070	68957962	10.34	92.13	51.54	44284877(91.51%)
LN-3d-1	76873608	73007864	10.95	91.92	53.01	78261157(89.37%)
LN-3d-2	52923288	50098664	7.51	91.72	52.08	53612301(86.07%)
LN-3d-3	59121990	56317840	8.45	91.43	52.9	56840458(92.18%)
CK-3d-1	64746076	61696668	9.25	91.1	52.96	76660495(94.64%)
CK-3d-2	96087730	91299308	13.69	91.33	52.58	78323562(94.45%)
CK-3d-3	50478132	48391498	7.26	91.23	52.53	70868067(94.97%)
LN-7d-1	66270998	62046118	9.31	91.57	51.73	69056537(94.59%)
LN-7d-2	59522554	54347822	8.15	92.02	52.52	46684473(93.19%)
LN-7d-3	65338138	60638972	9.1	91.49	52	53013833(94.13%)
CK-7d-1	91827216	87573552	13.14	91.31	51.4	56016270(90.28%)
CK-7d-2	65289552	62291048	9.34	92.23	51.57	49894870(91.81%)
CK-7d-3	66039032	61664432	9.25	91.91	52.25	56066066(92.46%)
LN and CK represented low nitrogen treatment and control, respectively.
