# Supplementary material for: Transcriptome and Co-Expression Network Analysis Reveals the Molecular Mechanism of Rice Root Systems in Response to Low-Nitrogen Conditions
Source: Int J Mol Sci. 2023 Mar 9;24(6):5290. doi: 10.3390/ijms24065290 (PMC10048922; doi:10.3390/ijms24065290)
Supplement: Supplementary file 1 [file ijms-24-05290-s001.zip › Supplementary Table S2.xlsx]

## Sheet: Sheet1
Supplementary Table S2. The top 23 enriched KEGG pathways for DEGs in 1std、3rdd and 7thd.
Pathway	Pathway ID	1std				3rdd				7thd
		Number of DEGs	up	down	P-value	Number of DEGs	up	down	P-value	Number of DEGs	up	down	P-value
Metabolic pathways	ko01100	39	12	27	0.000401791	123	24	99	0.000249382	255	36	219	0.856513
Plant-pathogen interaction	ko04626	10	4	6	0.358369	46	8	38	0.00961935	177	28	149	0
Biosynthesis of secondary metabolites	ko01110	30	13	17	5.07393e-05	94	26	68	1.80223e-07	176	27	149	0.124206
Plant hormone signal transduction	ko04075	3	2	1	0.865919	17	2	15	0.643647	98	19	79	4.60864e-10
MAPK signaling pathway - plant	ko04016	2	0	2	0.851593	10	0	10	0.814666	84	9	75	5.97078e-13
Biosynthesis of amino acids	ko01230	5	0	5	0.0772146	18	1	17	0.00269558	21	1	20	0.779389
alpha-Linolenic acid metabolism	ko00592	0	0	0	NA	6	3	3	0.0854431	19	2	7	0.000853513
Glutathione metabolism	ko00480	3	2	1	0.0843906	7	1	6	0.0984988	17	0	17	0.0136559
Diterpenoid biosynthesis	ko00904	5	5	0	0.00742804	12	7	5	0.00245634	14	4	10	0.422079
Amino sugar and nucleotide sugar metabolism	ko00520	1	0	1	0.789709	14	0	14	0.00221271	14	0	14	0.758459
Phenylalanine metabolism	ko00360	1	0	1	0.406786	1	0	1	0.863999	13	1	12	0.0032535
Cysteine and methionine metabolism	ko00270	6	1	5	0.00106736	13	2	11	0.000516307	11	1	10	0.699466
Tyrosine metabolism	ko00350	1	0	1	0.369805	3	0	3	0.252676	11	3	8	0.00907865
beta-Alanine metabolism	ko00410	0	0	0	NA	1	0	1	0.841347	11	2	9	0.01233
Arginine and proline metabolism	ko00330	4	1	3	0.00421761	3	0	3	0.45751	8	0	8	0.398354
Isoquinoline alkaloid biosynthesis	ko00950	1	0	1	0.221602	1	0	1	0.615996	8	2	6	0.0043906
Glycolysis / Gluconeogenesis	ko00010	6	0	6	0.002652	14	0	14	0.000900577	7	2	5	0.99308
Zeatin biosynthesis	ko00908	2	1	1	0.044007	6	0	6	0.00164193	7	3	4	0.0628931
Alanine, aspartate and glutamate metabolism	ko00250	1	0	1	0.397746	7	0	7	0.0030307	6	1	5	0.445603
2-Oxocarboxylic acid metabolism	ko01210	3	0	3	0.0150701	7	0	7	0.00356938	5	0	5	0.64989
Betalain biosynthesis	ko00965	0	0	0	NA	0	0	0	NA	5	0	5	0.000144246
Thiamine metabolism	ko00730	2	1	1	0.0153389	1	0	1	0.516666	1	0	1	0.873566
Anthocyanin biosynthesis	ko00942	1	0	1	0.019806	1	0	1	0.0735797	0	0	0	NA
