# Supplementary material for: Transcriptome and Co-Expression Network Analysis Reveals the Molecular Mechanism of Rice Root Systems in Response to Low-Nitrogen Conditions
Source: Int J Mol Sci. 2023 Mar 9;24(6):5290. doi: 10.3390/ijms24065290 (PMC10048922; doi:10.3390/ijms24065290)
Supplement: Supplementary file 1 [file ijms-24-05290-s001.zip › Supplementary Table S4.xlsx]

## Sheet: Glycolysis
Supplementary Table S4. The summary of DEGs related to Carbon metabolism.
Gene ID	Gene symbols	Gene annotation	LN-1d_vs_CK-1d.log2FoldChange	LN-3d_vs_CK-3d.log2FoldChange	LN-7d_vs_CK-7d.log2FoldChange
Os12g0178000	OsALDH3H1	Acetaldehyde dehydrogenase gene	-0.949374	-0.65966	-1.65232
Os09g0440300	OsALDH7	Acetaldehyde dehydrogenase gene	NA	0.0384741	-1.14268
Os08g0440800	OsALDH11A3	Acetaldehyde dehydrogenase gene	0.366659	-1.0522	0.14607
Os05g0469600	OsPDC1	Pyruvate decarboxylase gene	-2.75892	-6.04516	0.0934907
Os03g0432100	OsPPDKA	Pyruvate, phosphate dikinase 2	-4.12662	-4.92592	-0.00847799
Os01g0147900	OsTPI1	Triosephosphate isomerase	-0.837435	-1.63154	-0.0586897
Os02g0601300	OsGapC1	Glyceraldehyde-3-phosphate dehydrogenase	-0.651642	-1.28162	-0.182612
Os05g0469800	OsRRJ2	Thiamine pyrophosphate enzyme	-2.31863	-4.10141	-0.180049
Os10g0204400	OsPEPCK	Phosphoenolpyruvate carboxykinase	-2.16074	-5.45371	-0.0248139
Os11g0210500	OsADH2	Dehydrogenase	-0.0754089	-1.33446	0.0714316
Os11g0210600	OsADH3	Dehydrogenase	-0.142564	-1.42713	1.36955
Os04g0458600	NA	Aldose 1-epimerase	0.23644	-3.09831	0.241953
Os06g0104900	NA	Lactate/malate dehydrogenase	-3.71965	-6.02481	0.314315
Os11g0138400	NA	Retrotransposon protein	NA	0.95109	-5.53158
Os11g0138600	NA	Phosphoglycerate mutase	-0.18734	0.33847	-1.17578
Os12g0135051	NA	Pentatricopeptide	0.480072	0.71792	-2.48544
LN and CK represented low nitrogen treatment and control, respectively.

## Sheet: Oxidative phosphorylation
Supplementary Table S4. The summary of DEGs related to Carbon metabolism.
Gene ID	Gene symbols	Gene annotation	LN-1d_vs_CK-1d.log2FoldChange	LN-3d_vs_CK-3d.log2FoldChange	LN-7d_vs_CK-7d.log2FoldChange
Os02g0791400	NA	Cytochrome c oxidase subunit	-1.20468	-0.804377	0.309885
Os03g0759000	NA	DUF1336 domain containing protein	-0.108204	0.0453609	-1.62529
Os05g0438500	NA	Soluble inorganic pyrophosphatase	-0.0965134	0.229457	-2.03956
Os08g0496000	NA	Cytochrome c oxidase assembly protein COX15	-0.576364	-1.01912	0.136227
LN and CK represented low nitrogen treatment and control, respectively.

## Sheet: Pentose phosphate
Supplementary Table S4. The summary of DEGs related to Carbon metabolism.
Gene ID	Gene symbols	Gene annotation	LN-1d_vs_CK-1d.log2FoldChange	LN-3d_vs_CK-3d.log2FoldChange	LN-7d_vs_CK-7d.log2FoldChange
Os06g0247500	PFPβ	Pyrophosphate-fructose 6-phosphate 1-phosphotransferase (PFP) beta subunit	NA	NA	1.39516
Os07g0406300	OsG6PDH3	Glucose-6-phosphate 1-dehydrogenase, chloroplast precursor	-0.859603	-0.703273	-2.59393
Os03g0318500	OsG6PDH5	Glucose-6-phosphate 1-dehydrogenase	-0.283793	-2.43436	-0.240369
Os03g0776000	PGI-a	Glucose-6-phosphate isomerase	-0.132151	-1.03387	-0.140534
Os04g0306400	OsRPI	Ribose-5-phosphate isomerase A	0.116251	-0.359855	-1.21278
Os05g0194900	OsPPi-PFK	6-phosphofructokinase	-1.71437	-1.97202	-0.438419
Os08g0345700	OsPFPA3	Pyrophosphate--fructose 6-phosphate 1-phosphotransferase subunit alpha	-0.68408	-1.26078	0.0164478
Os01g0723600	NA	Phosphoribosyl transferase	-0.204086	-0.200544	-1.1095
Os04g0266900	NA	Transketolase, chloroplast precursor	0.392942	1.02958	-0.0509083
Os07g0406350	NA	Hypothetical protein	NA	NA	-2.83416
LN and CK represented low nitrogen treatment and control, respectively.

## Sheet: Starch and sucrose metabolism
Supplementary Table S4. The summary of DEGs related to Carbon metabolism.
Gene ID	Gene symbols	Gene annotation	LN-1d_vs_CK-1d.log2FoldChange	LN-3d_vs_CK-3d.log2FoldChange	LN-7d_vs_CK-7d.log2FoldChange
Os09g0511900	Os9bglu33	Beta-glucosidase homologue	0.389176	1.08294	0.051747
Os01g0312800	OsGH9B2	Endoglucanase	-0.536037	-0.045563	1.49562
Os06g0713800	Amy2A	Alpha-amylase precursor	-0.0451028	-0.115123	1.46862
Os07g0539300	OsGns13	Glucan endo-1,3-beta-glucosidase precursor	1.288	1.06171	0.762167
Os10g0465700	OsSTA246	Beta-amylase	0.46932	-0.262683	1.77828
LN and CK represented low nitrogen treatment and control, respectively.
