# Supplementary material for: Transcriptome and Co-Expression Network Analysis Reveals the Molecular Mechanism of Rice Root Systems in Response to Low-Nitrogen Conditions
Source: Int J Mol Sci. 2023 Mar 9;24(6):5290. doi: 10.3390/ijms24065290 (PMC10048922; doi:10.3390/ijms24065290)
Supplement: Supplementary file 1 [file ijms-24-05290-s001.zip › Supplementary Table S5.xlsx]

## Sheet: Root growth and development
Supplementary Table S5. The summary of DEGs related to root growth and phytohormone.
Gene ID	Gene symbols	Gene annotation	LN-1d_vs_CK-1d.log2FoldChange	LN-3d_vs_CK-3d.log2FoldChange	LN-7d_vs_CK-7d.log2FoldChange
Os01g0257300	OsRAA1	Root morphogenesis-related genes	-0.216888	-1.27976	-0.79295
Os03g0149000	OsCrll1	CRL1-like genes	-0.138559	0.0742672	1.05323
Os07g0684900	OsWOX11	WUSCHEL-related homeobox protein	-0.121114	-0.482857	-3.27659
Os01g0929200	OsRLCK53	Protein kinase	0.131437	0.365514	1.14107
Os06g0112700	OsDLN156	WRKY family of transcription factor	0.597708	0.42799	1.56329
Os01g0881900	NA	F-box/LRR-repeat protein 2	-0.383969	-1.41388	1.21476
Os02g0754450	NA	Hypothetical protein	0.725781	0.103629	1.00879
LN and CK represented low nitrogen treatment and control, respectively.

## Sheet: Auxin
Supplementary Table S5. The summary of DEGs related to root growth and phytohormone.
Gene ID	Gene symbols	Gene annotation	LN-1d_vs_CK-1d.log2FoldChange	LN-3d_vs_CK-3d.log2FoldChange	LN-7d_vs_CK-7d.log2FoldChange
Os08g0529000	OsPIN5b	Auxin efflux carrier	-1.85436	-4.22913	0.70839
Os09g0505400	OsPIN5c	Auxin efflux carrier	0.0730494	-0.427306	1.19217
Os01g0802700	OsPIN9	Auxin efflux transporter	-0.393983	-1.2576	0.333793
Os10g0147400	OsAUX4	Auxin influx transporter	-0.363003	0.2506	1.57426
Os02g0305950	OsSAUR7	Auxin-responsive SAUR gene family member	false	-4.467	2.18783
Os06g0671150	OsSAUR25	Auxin-responsive SAUR gene family member	-0.227238	0.150152	1.00332
Os06g0701900	OsSAUR27	Auxin-responsive SAUR gene family member	-0.312678	-0.214749	1.54177
Os08g0534950	OsSAUR34	Auxin-responsive SAUR gene family member	NA	-8.32792	2.41142
Os08g0534300	OsSAUR35	Auxin-responsive SAUR gene family member	false	-5.43198	2.35564
Os03g0321700	OsWRKY55	WRKY family of transcription factor	0.0329026	-0.13142	-1.19323
Os07g0116600	HLS1	HOOKLESS 1	-0.240657	0.131794	1.43285
Os09g0501100	NA	Protein of unknown function DUF568 domain containing protein	0.0893262	0.303577	1.61279
Os10g0560000	NA	Protein of unknown function DUF828 domain containing protein	0.206492	0.0900845	1.08704
LN and CK represented low nitrogen treatment and control, respectively.

## Sheet: Ethylene
Supplementary Table S5. The summary of DEGs related to root growth and phytohormone.
Gene ID	Gene symbols	Gene annotation	LN-1d_vs_CK-1d.log2FoldChange	LN-3d_vs_CK-3d.log2FoldChange	LN-7d_vs_CK-7d.log2FoldChange
Os02g0797100	OsWR3	Ethylene response factor	-0.603514	-0.34655	1.05986
Os06g0181700	OsERF2	Ethylene response factor	-0.286694	-0.0879738	-2.2885
Os11g0168500	OsERF118	Ethylene response factor	NA	NA	-4.05548
Os08g0454000	OsDERF1	Ethylene response factor	NA	NA	-2.33249
Os09g0286600	Sub1B	Ethylene response factor	0.415792	0.778431	1.24497
LN and CK represented low nitrogen treatment and control, respectively.

## Sheet: Jasmonic acid
Supplementary Table S5. The summary of DEGs related to root growth and phytohormone.
Gene ID	Gene symbols	Gene annotation	LN-1d_vs_CK-1d.log2FoldChange	LN-3d_vs_CK-3d.log2FoldChange	LN-7d_vs_CK-7d.log2FoldChange
Os04g0653000	OsJAZ1	TIFY family of transcription factor	-0.0453487	0.0200123	-1.14629
Os09g0439200	OsJAZ8	TIFY family of transcription factor	-0.412131	0.555005	-3.39485
Os11g0684000	OsJAMyb	MYB family of transcription factor	0.468646	1.08576	-2.80452
Os08g0499300	OsWRKY30	WRKY family of transcription factor	0.345709	0.435027	1.09028
Os02g0462800	OsWRKY42	WRKY family of transcription factor	NA	NA	-2.2548
LN and CK represented low nitrogen treatment and control, respectively.
