# Supplementary material for: Transcriptome and Co-Expression Network Analysis Reveals the Molecular Mechanism of Rice Root Systems in Response to Low-Nitrogen Conditions
Source: Int J Mol Sci. 2023 Mar 9;24(6):5290. doi: 10.3390/ijms24065290 (PMC10048922; doi:10.3390/ijms24065290)
Supplement: Supplementary file 1 [file ijms-24-05290-s001.zip › Supplementary Table S6.xlsx]

## Sheet: Sheet1
Supplementary Table S6. The distribution of DEGs related to nitrogen absorption and utilization in modules.
Module	Gene ID	Gene symbols	Gene annotation	LN-1d_vs_CK-1d.log2FoldChange	LN-3d_vs_CK-3d.log2FoldChange	LN-7d_vs_CK-7d.log2FoldChange
brown	Os03g0291500	OsAS1	Asparagine synthetase	-1.33664	-1.09341	-0.103746
brown	Os10g0554200	OsNRT1.1B	Nitrate transporter protein	-1.54796	-2.04402	NA
brown	Os02g0112100	OsNRT2.1	Nitrate transporter protein	-0.916493	-0.559248	-3.32664
brown	Os02g0112600	OsNRT2.2	Nitrate transporter protein	-0.837605	-0.694734	-3.74842
brown	Os01g0547600	OsNRT2.4	Nitrate transporter protein	-0.116759	1.19301	-0.312022
brown	Os12g0438600	OsCBSCLC7	Chloride transporter	-0.0225115	-0.363807	-3.0651
black	Os01g0748950	OsNPF4.5	Nitrate transporter protein	0.081578	0.614422	-2.97956
black	Os07g0589000	OsLBD39	LOB family transcription	-0.517454	-0.305765	-1.12093
black	Os05g0555600	OsNADH-GOGAT2	NADH-glutamate synthase gene	-1.51062	-4.62179	0.62652
black	Os01g0902800	NA	PTR-like peptide transporter	NA	-3.52919	0.938167
black	Os10g0112500	NA	Peptide transporter PTR2	-0.0329399	-1.03004	-0.22934
turquoise	Os01g0902700	NA	Peptide transporter PTR2	1.40546	1.3151	-0.321082
turquoise	Os03g0445700	OsLBD37	LOB family transcription	-1.15896	-1.15847	-1.10885
turquoise	Os03g0609500	OsLBD38	LOB family transcription	-1.54022	-1.72213	-2.35281
pink	Os02g0595900	OsNAR2.1	Nitrate transporter chaperone protein	-0.0808466	0.509087	-3.96867
pink	Os04g0597800	OsNPF7.3	Nitrate transporter protein	0.34728	0.540842	-2.46052
red	Os02g0770800	OsNR2	Nitrate reductase	-1.51569	-2.39179	-3.03352
yellow	Os08g0468100	OsNIA1	Nitrate reductase	-0.822286	-1.12809	-0.609664
blue	Os04g0441800	NA	Peptide transporter PTR2	0.367547	0.449919	-1.19421
green	Os06g0706100	NA	PTR-like peptide transporter	1.278	0.692205	-0.141061
LN and CK represented low nitrogen treatment and control, respectively.
