# Supplementary material for: Transcriptome and Co-Expression Network Analysis Reveals the Molecular Mechanism of Rice Root Systems in Response to Low-Nitrogen Conditions
Source: Int J Mol Sci. 2023 Mar 9;24(6):5290. doi: 10.3390/ijms24065290 (PMC10048922; doi:10.3390/ijms24065290)
Supplement: Supplementary file 1 [file ijms-24-05290-s001.zip › Supplementary Table S7.xlsx]

## Sheet: Brown Module
Supplementary Table S7. The relationships of Module Network Node.
FromNode	GoNode	Weight
OsNRT2.1	Os03g0195800	0.260691
OsNRT2.1	Os05g0527900	0.229943
OsNRT2.1	Os08g0188900	0.19663
OsNRT2.1	Os06g0177000	0.17673
OsNRT2.1	Os09g0327400	0.173089
OsNRT2.1	Os02g0194100	0.167766
OsNRT2.1	Os05g0301600	0.165176
OsNRT2.1	Os06g0187900	0.162555
OsNRT2.1	Os12g0154900	0.16137
OsNRT2.1	Os12g0637100	0.160704
OsNRT2.1	Os04g0403300	0.160028
OsNRT2.1	Os11g0274700	0.159548
OsNRT2.1	Os12g0154800	0.158111
OsNRT2.1	Os07g0572500	0.158075
OsNRT2.1	Os03g0607500	0.156645
OsNRT2.1	Os03g0668033	0.153645
OsNRT2.1	Os02g0620600	0.152291
OsNRT2.1	Os10g0563600	0.151884
OsNRT2.1	Os08g0189500	0.151711
OsNRT2.1	Os05g0439200	0.15153
OsNRT2.1	Os11g0582100	0.151135
OsNRT2.1	Os03g0211100	0.150278
OsNRT2.1	Os03g0337900	0.150059
OsNRT2.1	Os06g0152000	0.149523
OsNRT2.1	Os08g0195400	0.149185
OsNRT2.1	Os02g0810500	0.149128
OsNRT2.1	Os03g0815800	0.149009
OsNRT2.1	Os02g0177800	0.14845
OsNRT2.1	Os06g0573900	0.148151
OsNRT2.1	Os10g0478900	0.147244
OsNRT2.1	Os09g0353700	0.146271
OsNRT2.1	Os07g0157000	0.145673
OsNRT2.1	Os08g0520500	0.145407
OsNRT2.1	Os05g0100366	0.145161
OsNRT2.1	Os02g0823000	0.144953
OsNRT2.1	Os06g0522300	0.143741
OsNRT2.1	Os08g0100300	0.143499
OsNRT2.1	Os06g0647801	0.143176
OsNRT2.1	Os12g0155000	0.143102
OsNRT2.1	Os05g0126300	0.142663
OsNRT2.1	Os11g0661400	0.142489
OsNRT2.1	Os03g0608700	0.141895
OsNRT2.1	Os02g0720000	0.141602
OsNRT2.1	Os02g0599700	0.141407
OsNRT2.1	Os03g0607200	0.141037
OsNRT2.1	Os07g0187700	0.140545
OsNRT2.1	Os08g0206800	0.139928
OsNRT2.1	Os10g0490100	0.139377
OsNRT2.1	Os07g0490600	0.13879
OsNRT2.1	Os03g0833600	0.138595
OsNRT2.1	Os02g0631200	0.138405
OsNRT2.1	Os02g0180800	0.137806
OsNRT2.1	Os11g0264300	0.137444
OsNRT2.1	Os03g0793000	0.13727
OsNRT2.1	Os06g0581300	0.136791
OsNRT2.1	Os03g0389700	0.136754
OsNRT2.1	Os06g0645700	0.136357
OsNRT2.1	Os02g0735900	0.136037
OsNRT2.1	Os12g0154700	0.135902
OsNRT2.1	Os04g0691800	0.135874
OsNRT2.1	Os09g0113000	0.135763
OsNRT2.1	Os02g0131800	0.135471
OsNRT2.1	Os07g0150500	0.135307
OsNRT2.1	Os03g0220700	0.134927
OsNRT2.1	Os04g0509400	0.134771
OsNRT2.1	Os05g0508700	0.134731
OsNRT2.1	Os04g0431200	0.134558
OsNRT2.1	Os04g0486600	0.134451
OsNRT2.1	Os10g0577800	0.134158
OsNRT2.1	Os05g0561500	0.133702
OsNRT2.1	Os11g0523800	0.133563
OsNRT2.1	Os08g0190100	0.133508
OsNRT2.1	novel.742	0.133357
OsNRT2.1	Os08g0439200	0.133247
OsNRT2.1	Os02g0715400	0.133187
OsNRT2.1	novel.1058	0.133082
OsNRT2.1	Os05g0439000	0.133032
OsNRT2.1	Os12g0594201	0.132777
OsNRT2.1	Os02g0134300	0.132092
OsNRT2.1	Os12g0570000	0.131725
OsNRT2.1	Os12g0498300	0.131557
OsNRT2.1	Os09g0532900	0.131399
OsNRT2.1	Os08g0484700	0.131365
OsNRT2.1	Os08g0189850	0.130915
OsNRT2.1	Os06g0701300	0.130687
OsNRT2.1	Os11g0256400	0.130414
OsNRT2.1	Os02g0631100	0.129875
OsNRT2.1	Os06g0600400	0.129662
OsNRT2.1	Os07g0459400	0.12954
OsNRT2.1	Os04g0311500	0.129034
OsNRT2.1	novel.274	0.128685
OsNRT2.1	Os05g0513350	0.128658
OsNRT2.1	Os05g0195700	0.128451
OsNRT2.1	Os06g0133200	0.128411
OsNRT2.1	Os12g0507350	0.128406
OsNRT2.1	Os05g0530300	0.128219
OsNRT2.1	Os06g0503400	0.127921
OsNRT2.1	Os08g0189700	0.127593
OsNRT2.1	Os10g0147300	0.127467
OsNRT2.1	Os03g0622500	0.127292
OsNRT2.1	Os10g0405300	0.127262
OsNRT2.1	Os03g0265600	0.127156
OsNRT2.1	Os11g0532200	0.127146
OsNRT2.1	Os02g0690600	0.127144
OsNRT2.1	Os02g0734800	0.12703
OsNRT2.1	Os08g0189600	0.127018
OsNRT2.1	Os09g0419200	0.126472
OsNRT2.1	Os09g0286400	0.1264
OsNRT2.1	Os09g0386200	0.12631
OsNRT2.1	Os06g0578100	0.126285
OsNRT2.1	Os06g0647500	0.125638
OsNRT2.1	Os05g0410500	0.125623
OsNRT2.1	Os03g0310600	0.125384
OsNRT2.1	Os07g0227600	0.125257
OsNRT2.1	Os06g0660800	0.125114
OsNRT2.1	Os04g0534000	0.124882
OsNRT2.1	Os03g0791800	0.124662
OsNRT2.1	Os07g0633000	0.123863
OsNRT2.1	Os06g0647900	0.123808
OsNRT2.1	Os03g0308800	0.123699
OsNRT2.1	Os10g0548000	0.123564
OsNRT2.1	Os10g0524100	0.123074
OsNRT2.1	Os03g0230500	0.122927
OsNRT2.1	Os11g0546900	0.122903
OsNRT2.1	Os02g0177600	0.122643
OsNRT2.1	Os09g0413600	0.122609
OsNRT2.1	Os04g0405800	0.12166
OsNRT2.1	Os09g0526600	0.121592
OsNRT2.1	Os11g0151500	0.121591
OsNRT2.1	novel.77	0.121034
OsNRT2.1	Os06g0694000	0.120849
OsNRT2.1	Os11g0109000	0.120747
OsNRT2.1	Os08g0178800	0.120369
OsNRT2.1	Os02g0209000	0.119856
OsNRT2.1	Os05g0460000	0.119821
OsNRT2.1	Os12g0567300	0.119704
OsNRT2.1	Os02g0498100	0.119681
OsNRT2.1	Os04g0247500	0.119629
OsNRT2.1	Os09g0491644	0.119555
OsNRT2.1	Os02g0740400	0.119437
OsNRT2.1	Os07g0249700	0.119257
OsNRT2.1	Os04g0550600	0.118597
OsNRT2.2	Os03g0195800	0.249445
OsNRT2.2	Os05g0527900	0.217694
OsNRT2.2	Os08g0188900	0.180081
OsNRT2.2	Os09g0327400	0.169869
OsNRT2.2	Os02g0194100	0.16691
OsNRT2.2	Os06g0187900	0.166041
OsNRT2.2	Os11g0274700	0.162005
OsNRT2.2	Os05g0301600	0.161489
OsNRT2.2	Os04g0403300	0.159738
OsNRT2.2	Os12g0637100	0.158746
OsNRT2.2	Os03g0607500	0.157533
OsNRT2.2	Os05g0100366	0.156472
OsNRT2.2	Os06g0152000	0.155589
OsNRT2.2	Os03g0668033	0.155381
OsNRT2.2	Os06g0177000	0.153841
OsNRT2.2	Os05g0439200	0.152912
OsNRT2.2	Os02g0177800	0.152865
OsNRT2.2	Os10g0478900	0.152622
OsNRT2.2	Os12g0154900	0.152583
OsNRT2.2	Os03g0337900	0.150492
OsNRT2.2	Os08g0520500	0.149302
OsNRT2.2	Os11g0661400	0.149074
OsNRT2.2	Os07g0572500	0.148704
OsNRT2.2	Os12g0154800	0.14774
OsNRT2.2	Os08g0100300	0.147506
OsNRT2.2	Os02g0823000	0.147244
OsNRT2.2	Os10g0563600	0.146096
OsNRT2.2	Os03g0815800	0.145455
OsNRT2.2	Os03g0608700	0.144704
OsNRT2.2	Os03g0211100	0.143944
OsNRT2.2	Os08g0195400	0.143891
OsNRT2.2	Os07g0157000	0.143629
OsNRT2.2	Os08g0189500	0.143247
OsNRT2.2	Os03g0793000	0.142784
OsNRT2.2	Os06g0573900	0.142249
OsNRT2.2	Os02g0599700	0.141773
OsNRT2.2	Os07g0187700	0.141696
OsNRT2.2	Os03g0833600	0.141554
OsNRT2.2	Os11g0582100	0.141237
OsNRT2.2	Os02g0810500	0.140981
OsNRT2.2	Os11g0523800	0.139829
OsNRT2.2	Os07g0150500	0.139357
OsNRT2.2	Os12g0498300	0.138736
OsNRT2.2	Os11g0264300	0.137752
OsNRT2.2	novel.1058	0.137675
OsNRT2.2	Os08g0206800	0.137482
OsNRT2.2	Os03g0220700	0.137445
OsNRT2.2	Os02g0735900	0.136307
OsNRT2.2	Os09g0353700	0.136177
OsNRT2.2	Os04g0486600	0.135899
OsNRT2.2	Os07g0490600	0.135811
OsNRT2.2	Os06g0522300	0.135633
OsNRT2.2	Os10g0490100	0.135619
OsNRT2.2	Os03g0607200	0.135293
OsNRT2.2	Os12g0594201	0.135018
OsNRT2.2	Os03g0389700	0.135011
OsNRT2.2	Os08g0439200	0.134976
OsNRT2.2	Os05g0126300	0.134202
OsNRT2.2	Os06g0647801	0.133908
OsNRT2.2	Os04g0509400	0.133808
OsNRT2.2	Os02g0620600	0.133601
OsNRT2.2	Os12g0570000	0.133554
OsNRT2.2	Os05g0513350	0.133407
OsNRT2.2	Os02g0720000	0.133137
OsNRT2.2	Os12g0507350	0.132679
OsNRT2.2	Os05g0561500	0.132481
OsNRT2.2	Os12g0155000	0.131689
OsNRT2.2	Os06g0645700	0.131554
OsNRT2.2	Os02g0131800	0.131296
OsNRT2.2	Os04g0311500	0.130988
OsNRT2.2	Os10g0405300	0.130957
OsNRT2.2	Os02g0715400	0.130795
OsNRT2.2	Os09g0113000	0.130264
OsNRT2.2	Os04g0431200	0.130189
OsNRT2.2	Os02g0180800	0.13
OsNRT2.2	Os08g0190100	0.129594
OsNRT2.2	Os10g0577800	0.129583
OsNRT2.2	Os10g0147300	0.129144
OsNRT2.2	Os06g0503400	0.128956
OsNRT2.2	Os02g0631200	0.127965
OsNRT2.2	Os09g0532900	0.127496
OsNRT2.2	novel.742	0.127355
OsNRT2.2	Os02g0631100	0.127125
OsNRT2.2	Os05g0530300	0.12608
OsNRT2.2	Os04g0534000	0.126006
OsNRT2.2	Os03g0791800	0.125936
OsNRT2.2	Os04g0691800	0.125783
OsNRT2.2	Os08g0484700	0.125746
OsNRT2.2	Os06g0701300	0.125607
OsNRT2.2	Os12g0154700	0.125584
OsNRT2.2	Os11g0256400	0.125535
OsNRT2.2	Os07g0459400	0.125284
OsNRT2.2	Os06g0581300	0.124916
OsNRT2.2	Os06g0600400	0.124827
OsNRT2.2	novel.274	0.124735
OsNRT2.2	Os02g0134300	0.124584
OsNRT2.2	Os05g0410500	0.124361
OsNRT2.2	Os02g0734800	0.124179
OsNRT2.2	Os02g0177600	0.123846
OsNRT2.2	Os05g0508700	0.123657
OsNRT2.2	Os09g0419200	0.123483
OsNRT2.2	Os06g0133200	0.123447
OsNRT2.2	Os08g0189850	0.123119
OsNRT2.2	Os05g0439000	0.122658
OsNRT2.2	Os07g0623100	0.122363
OsNRT2.2	Os05g0195700	0.121951
OsNRT2.2	Os09g0491644	0.121938
OsNRT2.2	Os08g0189600	0.12172
OsNRT2.2	Os06g0578100	0.121527
OsNRT2.2	Os02g0690600	0.120936
OsNRT2.2	Os11g0151500	0.120507
OsNRT2.2	Os03g0310600	0.119909
OsNRT2.2	Os10g0369600	0.119844
OsNRT2.2	Os03g0160200	0.119165
OsNRT2.2	Os05g0422600	0.119085
OsNRT2.2	Os08g0178800	0.11893
OsNRT2.2	Os08g0189700	0.118904
OsNRT2.2	Os09g0286400	0.118721
OsNRT2.2	Os10g0548000	0.118428
OsNRT2.2	Os09g0386200	0.118268
OsNRT2.2	novel.77	0.118004
OsNRT2.2	Os04g0219550	0.117918
fromNode	goNode	weight
OsNRT2.4	Os02g0622500	0.290256
OsNRT2.4	Os02g0734400	0.29004
OsNRT2.4	Os11g0582100	0.288534
OsNRT2.4	Os06g0660800	0.286077
OsNRT2.4	Os03g0181750	0.285312
OsNRT2.4	Os03g0265600	0.285049
OsNRT2.4	Os03g0622500	0.282321
OsNRT2.4	Os07g0227600	0.282152
OsNRT2.4	Os12g0573900	0.281141
OsNRT2.4	Os06g0581300	0.278761
OsNRT2.4	Os12g0123700	0.269662
OsNRT2.4	Os03g0802200	0.269059
OsNRT2.4	Os06g0647801	0.267447
OsNRT2.4	Os05g0460000	0.267215
OsNRT2.4	Os10g0563600	0.266169
OsNRT2.4	Os06g0647900	0.265847
OsNRT2.4	novel.990	0.265453
OsNRT2.4	Os02g0521100	0.265038
OsNRT2.4	Os02g0134300	0.264739
OsNRT2.4	Os07g0502200	0.264448
OsNRT2.4	Os02g0816800	0.264191
OsNRT2.4	Os02g0680700	0.263184
OsNRT2.4	Os10g0564800	0.262859
OsNRT2.4	Os09g0526600	0.260832
OsNRT2.4	Os09g0456800	0.259929
OsNRT2.4	Os06g0597600	0.259578
OsNRT2.4	Os08g0520300	0.259281
OsNRT2.4	Os09g0454900	0.259123
OsNRT2.4	Os04g0142400	0.257787
OsNRT2.4	Os05g0434800	0.257195
OsNRT2.4	Os02g0631200	0.256751
OsNRT2.4	Os09g0413600	0.256628
OsNRT2.4	Os05g0437800	0.256001
OsNRT2.4	Os09g0386200	0.255164
OsNRT2.4	Os06g0166400	0.251526
OsNRT2.4	Os03g0340900	0.250558
OsNRT2.4	Os10g0577800	0.250285
OsNRT2.4	Os02g0528200	0.249174
OsNRT2.4	Os06g0701300	0.249019
OsNRT2.4	Os02g0810500	0.248635
OsNRT2.4	Os04g0120300	0.248382
OsNRT2.4	Os05g0134200	0.248128
OsNRT2.4	Os05g0544600	0.247887
OsNRT2.4	Os06g0600400	0.247686
OsNRT2.4	Os08g0148600	0.246716
OsNRT2.4	Os11g0532200	0.244844
OsNRT2.4	Os02g0740400	0.244672
OsNRT2.4	Os07g0121800	0.244338
OsNRT2.4	novel.459	0.243969
OsNRT2.4	Os09g0299200	0.24351
OsNRT2.4	Os04g0448900	0.242676
OsNRT2.4	novel.274	0.240413
OsNRT2.4	Os02g0180800	0.240006
OsNRT2.4	Os10g0406900	0.23929
OsNRT2.4	Os10g0198100	0.239184
OsNRT2.4	Os04g0443700	0.237899
OsNRT2.4	Os08g0535800	0.237529
OsNRT2.4	novel.742	0.237153
OsNRT2.4	Os03g0784500	0.23663
OsNRT2.4	Os06g0573900	0.2342
OsNRT2.4	Os01g0967400	0.23413
OsNRT2.4	Os03g0198900	0.2326
OsNRT2.4	Os05g0439000	0.232501
OsNRT2.4	Os01g0728300	0.232402
OsNRT2.4	Os06g0647500	0.232287
OsNRT2.4	Os03g0130400	0.229332
OsNRT2.4	Os05g0390300	0.228981
OsNRT2.4	Os03g0230500	0.228968
OsNRT2.4	Os04g0691800	0.228619
OsNRT2.4	Os06g0712300	0.228447
OsNRT2.4	Os06g0133200	0.228365
OsNRT2.4	Os03g0169600	0.228077
OsNRT2.4	Os02g0433600	0.22679
OsNRT2.4	Os08g0441100	0.22623
OsNRT2.4	Os10g0548000	0.225733
OsNRT2.4	Os10g0479100	0.225318
OsNRT2.4	Os06g0581300	0.225025
OsNRT2.4	Os07g0249700	0.223772
OsNRT2.4	Os02g0182700	0.223559
OsNRT2.4	Os11g0210201	0.223459
OsNRT2.4	Os04g0539500	0.223041
OsNRT2.4	Os05g0195700	0.222694
OsNRT2.4	Os05g0410200	0.221935
OsNRT2.4	Os01g0646400	0.221276
OsNRT2.4	Os06g0266400	0.220988
OsNRT2.4	Os02g0631100	0.220824
OsNRT2.4	Os03g0189100	0.220545
OsNRT2.4	Os09g0510900	0.220447
OsNRT2.4	Os03g0432900	0.219832
OsNRT2.4	Os06g0268600	0.219767
OsNRT2.4	Os07g0565300	0.219601
OsNRT2.4	Os08g0396700	0.218809
OsNRT2.4	Os05g0301600	0.218611
OsNRT2.4	Os02g0628600	0.217906
OsNRT2.4	Os03g0745400	0.217888
OsNRT2.4	Os03g0758100	0.217781
OsNRT2.4	Os10g0546400	0.21712
OsNRT2.4	Os02g0684800	0.217091
OsNRT2.4	Os06g0163400	0.215345
OsNRT2.4	Os01g0598900	0.215329
OsNRT2.4	Os04g0585900	0.21417
OsNRT2.4	Os02g0782300	0.213521
OsNRT2.4	Os04g0436300	0.213409
OsNRT2.4	Os10g0502500	0.213103
OsNRT2.4	Os02g0809500	0.212838
OsNRT2.4	Os08g0500300	0.21278
OsNRT2.4	Os09g0343600	0.212777
OsNRT2.4	Os10g0399100	0.212685
OsNRT2.4	Os03g0752700	0.212449
OsNRT2.4	Os11g0546900	0.211435
OsNRT2.4	Os10g0389500	0.21104
OsNRT2.4	Os05g0562300	0.210374
OsNRT2.4	Os06g0597500	0.209832
OsNRT2.4	Os12g0134900	0.209788
OsNRT2.4	novel.521	0.209201
OsNRT2.4	Os07g0688500	0.208915
OsNRT2.4	Os03g0747700	0.20883
OsNRT2.4	Os07g0633000	0.208797
OsNRT2.4	Os07g0410100	0.208668
OsNRT2.4	Os08g0139400	0.208335
OsNRT2.4	Os02g0612200	0.206969
OsNRT2.4	Os09g0456900	0.206306
OsNRT2.4	Os02g0715400	0.206306
OsNRT2.4	Os05g0494100	0.205718
OsNRT2.4	Os03g0348800	0.205605
OsNRT2.4	Os06g0578700	0.205497
OsNRT2.4	Os03g0211100	0.205469
OsNRT2.4	Os04g0631600	0.205202
OsNRT2.4	novel.212	0.205189
OsNRT2.4	novel.378	0.205104
OsNRT2.4	Os11g0256400	0.204741
OsNRT2.4	Os01g0895600	0.204668
OsNRT2.4	Os11g0131100	0.204181
OsNRT2.4	Os05g0498633	0.202607
OsNRT2.4	Os08g0206900	0.20258
OsNRT2.4	Os09g0487600	0.202345
OsNRT2.4	Os02g0731300	0.200809
OsNRT2.4	Os04g0431200	0.200798
OsNRT2.4	Os04g0509400	0.20075
OsNRT2.4	Os03g0607200	0.200158
OsNRT2.4	Os05g0145100	0.200153
OsNRT2.4	Os07g0128800	0.20009
OsNRT2.4	Os07g0584200	0.2
OsNRT2.4	Os09g0489200	0.199357
OsNRT2.4	Os04g0385600	0.199332
OsNRT2.4	Os01g0904700	0.199327
OsNRT2.4	Os01g0627500	0.198908
OsNRT2.4	Os12g0618600	0.198384
OsNRT2.4	Os02g0190800	0.198331
OsNRT2.4	Os10g0467000	0.197847
OsNRT2.4	Os08g0478200	0.197473
OsNRT2.4	Os01g0689900	0.197197
OsNRT2.4	Os06g0184800	0.197123
OsNRT2.4	Os06g0259901	0.196972
OsNRT2.4	Os09g0419200	0.196836
OsNRT2.4	Os03g0308800	0.196193
OsNRT2.4	Os10g0485300	0.195628
OsNRT2.4	Os08g0520900	0.195576
OsNRT2.4	Os04g0405800	0.195555
OsNRT2.4	Os07g0606600	0.195352
OsNRT2.4	Os01g0866100	0.19527
OsNRT2.4	novel.743	0.195203
OsNRT2.4	Os09g0532900	0.195174
OsNRT2.4	Os07g0200700	0.195112
OsNRT2.4	Os07g0661450	0.195106
OsNRT2.4	Os01g0971800	0.194807
OsNRT2.4	Os12g0514400	0.194715
OsNRT2.4	Os06g0578100	0.194683
OsNRT2.4	Os01g0687300	0.194624
OsNRT2.4	Os01g0588400	0.194522
OsNRT2.4	Os07g0518100	0.19428
OsNRT2.4	novel.265	0.194217
OsNRT2.4	Os01g0720300	0.194079
OsNRT2.4	Os01g0840100	0.19332
OsNRT2.4	Os06g0216200	0.193028
OsNRT2.4	Os05g0179300	0.192672
OsNRT2.4	Os02g0774100	0.192578
OsNRT2.4	Os03g0337900	0.192203
OsNRT2.4	Os10g0548000	0.192127
OsNRT2.4	Os12g0601400	0.19202
OsNRT2.4	Os08g0558100	0.191899
OsNRT2.4	Os03g0175200	0.191621
OsNRT2.4	Os06g0206700	0.191582
OsNRT2.4	Os02g0209000	0.191557
OsNRT2.4	Os06g0691000	0.19155
OsNRT2.4	Os01g0948200	0.191526
OsNRT2.4	Os11g0109000	0.190582
OsNRT2.4	Os08g0157600	0.190438
OsNRT2.4	Os01g0920500	0.190405
OsNRT2.4	Os03g0822400	0.190395
OsNRT2.4	Os04g0352400	0.190267
OsNRT2.4	novel.376	0.190115
OsNRT2.4	Os02g0507400	0.189774
OsNRT2.4	Os12g0567300	0.189303
OsNRT2.4	Os06g0654900	0.188691
OsNRT2.4	Os03g0601000	0.188583
OsNRT2.4	Os03g0858200	0.18849
OsNRT2.4	Os05g0568600	0.188351
OsNRT2.4	Os03g0387900	0.188348
OsNRT2.4	Os02g0208500	0.188165
OsNRT2.4	Os02g0681700	0.188072
OsNRT2.4	Os06g0694000	0.187885
OsNRT2.4	Os03g0277300	0.187875
OsNRT2.4	Os11g0207400	0.187869
OsNRT2.4	Os02g0626400	0.187774
OsNRT2.4	Os02g0787100	0.187701
OsNRT2.4	Os11g0543500	0.187676
OsNRT2.4	Os03g0413000	0.187601
OsNRT2.4	novel.982	0.187561
OsNRT2.4	Os04g0655300	0.187031
OsNRT2.4	Os05g0508700	0.18679
OsNRT2.4	Os04g0550600	0.18668
OsNRT2.4	Os02g0646500	0.186409
OsNRT2.4	Os12g0510750	0.186115
OsNRT2.4	Os10g0441900	0.186001
OsNRT2.4	Os06g0125600	0.185894
OsNRT2.4	Os10g0545700	0.18583
OsNRT2.4	Os02g0465900	0.185826
OsNRT2.4	Os12g0124500	0.185767
OsNRT2.4	Os03g0805500	0.185568
OsNRT2.4	Os02g0784801	0.185397
OsNRT2.4	Os02g0724000	0.185108
OsNRT2.4	Os04g0632100	0.184969
OsNRT2.4	Os04g0615000	0.184891
OsNRT2.4	Os05g0311500	0.184823
OsNRT2.4	Os09g0419200	0.18481
OsNRT2.4	Os12g0594000	0.184704
OsNRT2.4	Os10g0534900	0.184668
OsNRT2.4	Os09g0343200	0.184398
OsNRT2.4	Os01g0649400	0.184385
OsNRT2.4	Os04g0486600	0.184234
OsNRT2.4	Os02g0131800	0.184226
OsNRT2.4	Os12g0149300	0.183919
OsNRT2.4	Os04g0465800	0.183849
OsNRT2.4	novel.503	0.183492
OsNRT2.4	Os10g0579300	0.18343
OsNRT2.4	Os09g0438000	0.183306
OsNRT2.4	Os02g0823100	0.18319
OsNRT2.4	Os04g0537100	0.182926
OsNRT2.4	Os12g0570000	0.182897
OsNRT2.4	Os03g0638900	0.182862
OsNRT2.4	Os06g0147200	0.182834
OsNRT2.4	Os05g0561900	0.182818
OsNRT2.4	Os08g0178800	0.182782
OsNRT2.4	Os07g0683900	0.18262
OsNRT2.4	Os05g0207400	0.182535
OsNRT2.4	Os01g0962000	0.182468
OsNRT2.4	Os03g0607500	0.18244
OsNRT2.4	Os07g0103100	0.182435
OsNRT2.4	Os02g0133800	0.182352
OsNRT2.4	Os02g0201300	0.182221
OsNRT2.4	Os08g0106300	0.182063
OsNRT2.4	Os02g0833200	0.181877
OsNRT2.4	Os02g0494400	0.181848
OsNRT2.4	Os10g0326400	0.181817
OsNRT2.4	Os10g0173000	0.181591
OsNRT2.4	Os03g0109600	0.181506
OsNRT2.4	Os03g0701400	0.181304
OsNRT2.4	Os02g0141500	0.181056
OsNRT2.4	Os06g0200250	0.181049
OsNRT2.4	Os08g0508500	0.181026
OsNRT2.4	Os11g0557800	0.180915
OsNRT2.4	novel.70	0.180911
OsNRT2.4	Os02g0511400	0.180883
OsNRT2.4	Os03g0789200	0.180857
OsNRT2.4	Os07g0618700	0.180624
OsNRT2.4	Os11g0219400	0.180416
OsNRT2.4	Os02g0193933	0.180351
OsNRT2.4	Os07g0538400	0.180244
OsNRT2.4	Os02g0164800	0.180212
OsNRT2.4	Os01g0778500	0.179924
OsNRT2.4	Os05g0505383	0.179753
OsNRT2.4	Os08g0170100	0.17975
OsNRT2.4	Os02g0468400	0.179742
OsNRT2.4	Os07g0459400	0.179607
OsNRT2.4	Os02g0486500	0.17953
OsNRT2.4	novel.1144	0.179401
OsNRT2.4	novel.641	0.179377
OsNRT2.4	Os03g0146000	0.179245
OsNRT2.4	Os04g0578550	0.179049
OsNRT2.4	Os03g0684400	0.178845
OsNRT2.4	Os06g0704000	0.178826
OsNRT2.4	Os08g0195400	0.178805
OsNRT2.4	Os01g0867300	0.178497
OsNRT2.4	Os02g0126000	0.178423
OsNRT2.4	Os03g0586500	0.178405
OsNRT2.4	Os06g0645700	0.17819
OsNRT2.4	Os07g0646100	0.178151
OsNRT2.4	Os02g0744900	0.178012
OsNRT2.4	Os01g0580500	0.177852
OsNRT2.4	Os02g0562400	0.177804
OsNRT2.4	Os01g0846700	0.17746
OsNRT2.4	Os12g0472366	0.177412
OsNRT2.4	Os03g0688300	0.177207
OsNRT2.4	Os06g0631300	0.177173
OsNRT2.4	Os04g0683700	0.177069
OsNRT2.4	Os05g0138200	0.177035
OsNRT2.4	Os06g0661400	0.177018
OsNRT2.4	Os01g0642200	0.176845
OsNRT2.4	novel.198	0.176504
OsNRT2.4	Os04g0247500	0.176041
OsNRT2.4	Os05g0410500	0.175917
OsNRT2.4	Os09g0471100	0.175878
OsNRT2.4	Os02g0797600	0.175792
OsNRT2.4	Os06g0683100	0.175784
OsNRT2.4	Os09g0286400	0.175711
OsNRT2.4	Os09g0515550	0.175603
OsNRT2.4	Os08g0513700	0.175302
OsNRT2.4	Os03g0815800	0.17522
OsNRT2.4	Os09g0339000	0.1752
OsNRT2.4	Os04g0474300	0.175128
OsNRT2.4	Os08g0431500	0.174999
OsNRT2.4	Os03g0389700	0.174915
OsNRT2.4	Os10g0479800	0.174755
OsNRT2.4	Os05g0200700	0.174707
OsNRT2.4	Os06g0639100	0.174578
OsNRT2.4	Os03g0583800	0.174549
OsNRT2.4	Os03g0619600	0.174506
OsNRT2.4	Os08g0300901	0.174454
OsNRT2.4	Os05g0125000	0.174211
OsNRT2.4	Os06g0661200	0.174042
OsNRT2.4	Os12g0193800	0.17403
OsNRT2.4	Os10g0521000	0.174014
OsNRT2.4	Os10g0442000	0.173988
OsNRT2.4	Os02g0131300	0.173923
OsNRT2.4	Os11g0559200	0.173804
OsNRT2.4	Os09g0401200	0.173788
OsNRT2.4	Os10g0524100	0.173773
OsNRT2.4	Os09g0458100	0.173754
OsNRT2.4	Os02g0255700	0.173713
OsNRT2.4	Os11g0528500	0.173603
OsNRT2.4	Os12g0460100	0.173565
OsNRT2.4	Os07g0574300	0.173451
OsNRT2.4	Os11g0215100	0.17342
OsNRT2.4	Os05g0142000	0.173357
OsNRT2.4	Os01g0856900	0.173351
OsNRT2.4	novel.561	0.17299
OsNRT2.4	Os01g0872100	0.17286
OsNRT2.4	Os02g0490000	0.172758
OsNRT2.4	Os03g0800400	0.172655
OsNRT2.4	novel.946	0.172531
OsNRT2.4	Os08g0517500	0.172454
OsNRT2.4	Os09g0572400	0.172391
OsNRT2.4	Os01g0776300	0.172373
OsNRT2.4	Os11g0521500	0.172096
OsNRT2.4	Os08g0431800	0.171876
OsNRT2.4	Os09g0556400	0.171872
OsNRT2.4	Os12g0573000	0.171853
OsNRT2.4	Os08g0484700	0.17174
OsNRT2.4	Os02g0735900	0.171716
OsNRT2.4	Os08g0535900	0.171715
OsNRT2.4	Os06g0155600	0.171601
OsNRT2.4	Os04g0475600	0.171452
OsNRT2.4	Os04g0416400	0.171419
OsNRT2.4	Os08g0179400	0.171355
OsNRT2.4	Os05g0530300	0.171081
OsNRT2.4	Os02g0584900	0.170836
OsNRT2.4	Os02g0567800	0.170826
OsNRT2.4	Os03g0705800	0.170766
OsNRT2.4	Os05g0397800	0.170525
OsNRT2.4	Os01g0728400	0.170516
OsNRT2.4	Os03g0261100	0.17046
OsNRT2.4	Os04g0578400	0.17044
OsNRT2.4	Os02g0160800	0.170301
OsNRT2.4	Os11g0645400	0.170059
OsNRT2.4	Os02g0171100	0.169942
OsNRT2.4	Os07g0617700	0.169829
OsNRT2.4	Os11g0575500	0.169806
OsNRT2.4	Os03g0431800	0.169746
OsNRT2.4	Os07g0572500	0.169733
OsNRT2.4	Os09g0112100	0.169631
OsNRT2.4	Os07g0585800	0.169463
OsNRT2.4	Os06g0503400	0.169414
OsNRT2.4	Os06g0287200	0.169383
OsNRT2.4	Os10g0500300	0.169237
OsNRT2.4	Os03g0287800	0.169223
OsNRT2.4	Os07g0566200	0.169108
OsNRT2.4	novel.77	0.169071
OsNRT2.4	Os07g0595750	0.168986
OsNRT2.4	Os07g0585900	0.168902
OsNRT2.4	Os02g0729400	0.168672
OsNRT2.4	Os04g0610100	0.168627
OsNRT2.4	Os03g0334700	0.168509
OsNRT2.4	Os01g0658400	0.168458
OsNRT2.4	Os06g0704700	0.168448
OsNRT2.4	Os12g0116700	0.168409
OsNRT2.4	Os03g0803700	0.168368
OsNRT2.4	Os08g0238700	0.168265
OsNRT2.4	novel.843	0.168222
OsNRT2.4	Os10g0577200	0.168208
OsNRT2.4	Os01g0700000	0.167973
OsNRT2.4	Os04g0534000	0.167723
OsNRT2.4	Os02g0265900	0.167673
OsNRT2.4	Os09g0501100	0.167598
OsNRT2.4	Os03g0770000	0.167528
OsNRT2.4	Os02g0574600	0.166856
OsNRT2.4	Os08g0170200	0.16671
OsNRT2.4	Os06g0648200	0.166621
OsNRT2.4	Os05g0525200	0.166514
OsNRT2.4	Os08g0127800	0.166512
OsNRT2.4	Os02g0216500	0.166474
OsNRT2.4	Os07g0511900	0.166195
OsNRT2.4	Os08g0444440	0.166151
OsNRT2.4	Os03g0760900	0.165803
OsNRT2.4	Os08g0144000	0.165572
OsNRT2.4	Os08g0153900	0.165314
OsNRT2.4	Os05g0428700	0.165304
OsNRT2.4	Os02g0688800	0.165292
OsNRT2.4	Os10g0494800	0.16529
OsNRT2.4	Os08g0178800	0.165198
OsNRT2.4	Os11g0695800	0.165129
OsNRT2.4	Os04g0540500	0.165108
OsNRT2.4	Os04g0432000	0.164943
OsNRT2.4	Os06g0319133	0.164807
OsNRT2.4	novel.891	0.164722
OsNRT2.4	Os10g0565300	0.164616
OsNRT2.4	novel.776	0.164257
OsNRT2.4	Os03g0144300	0.16425
OsNRT2.4	Os12g0478200	0.164156
OsNRT2.4	Os04g0219600	0.164005
OsNRT2.4	Os03g0425900	0.163994
OsNRT2.4	Os01g0627400	0.163887
OsNRT2.4	Os02g0697900	0.163861
OsNRT2.4	Os08g0434632	0.163827
OsNRT2.4	Os04g0509100	0.163794
OsNRT2.4	Os02g0696600	0.163781
OsNRT2.4	Os04g0247500	0.163689
OsNRT2.4	Os10g0147900	0.163638
OsNRT2.4	Os02g0606200	0.163636
OsNRT2.4	Os05g0589200	0.163577
OsNRT2.4	Os01g0686300	0.16357
OsNRT2.4	Os01g0873700	0.163543
OsNRT2.4	Os01g0805900	0.163461
OsNRT2.4	Os10g0572400	0.163332
OsNRT2.4	Os03g0363600	0.163236
OsNRT2.4	Os06g0714951	0.163069
OsNRT2.4	Os03g0795900	0.163021
OsNRT2.4	Os05g0514200	0.162766
OsNRT2.4	Os08g0169300	0.162757
OsNRT2.4	Os07g0639000	0.162644
OsNRT2.4	Os09g0296800	0.162616
OsNRT2.4	Os05g0459300	0.162563
OsNRT2.4	novel.169	0.162513
OsNRT2.4	Os03g0333700	0.162354
OsNRT2.4	Os02g0176650	0.16228
OsNRT2.4	novel.1099	0.162174
OsNRT2.4	Os12g0556100	0.16177
OsNRT2.4	Os02g0177600	0.161744
OsNRT2.4	Os04g0228400	0.16128
OsNRT2.4	Os02g0823000	0.161243
OsNRT2.4	Os09g0443700	0.161028
OsNRT2.4	Os05g0401300	0.160965
OsNRT2.4	Os06g0712700	0.160952
OsNRT2.4	Os03g0361700	0.160907
OsNRT2.4	Os05g0120700	0.160885
OsNRT2.4	Os03g0660700	0.160776
OsNRT2.4	Os01g0910300	0.160665
OsNRT2.4	Os09g0436800	0.160531
OsNRT2.4	Os02g0734800	0.160424
OsNRT2.4	Os05g0412400	0.16041
OsNRT2.4	Os12g0284800	0.160404
OsNRT2.4	Os01g0740600	0.160296
OsNRT2.4	Os04g0210700	0.159965
OsNRT2.4	novel.442	0.159904
OsNRT2.4	Os06g0635200	0.15988
OsNRT2.4	Os09g0406900	0.159878
OsNRT2.4	Os09g0403000	0.15952
OsNRT2.4	Os04g0320100	0.159413
OsNRT2.4	Os02g0781700	0.159299
OsNRT2.4	Os06g0303800	0.159252
OsNRT2.4	novel.648	0.159077
OsNRT2.4	Os05g0126300	0.158835
OsNRT2.4	Os01g0721000	0.158799
OsNRT2.4	Os07g0516500	0.158778
OsNRT2.4	Os10g0533500	0.158759
OsNRT2.4	Os01g0846800	0.158712
OsNRT2.4	Os06g0676300	0.158631
OsNRT2.4	Os04g0403600	0.158488
OsNRT2.4	Os09g0316000	0.158451
OsNRT2.4	Os10g0405300	0.158273
OsNRT2.4	Os03g0754200	0.158198
OsNRT2.4	Os10g0396300	0.157818
OsNRT2.4	Os04g0689700	0.157803
OsNRT2.4	Os08g0557800	0.157728
OsNRT2.4	Os03g0124000	0.157604
OsNRT2.4	Os08g0562200	0.157575
OsNRT2.4	Os11g0546300	0.157459
OsNRT2.4	Os02g0617800	0.157415
OsNRT2.4	Os09g0457700	0.157287
OsNRT2.4	Os01g0725800	0.157234
OsNRT2.4	Os05g0561700	0.15717
OsNRT2.4	Os12g0152750	0.157145
OsNRT2.4	Os11g0480000	0.157139
OsNRT2.4	Os01g0695700	0.157115
OsNRT2.4	Os03g0808600	0.157034
OsNRT2.4	Os10g0516200	0.156968
OsNRT2.4	novel.977	0.156834
OsNRT2.4	Os09g0427125	0.156588
OsNRT2.4	Os05g0468700	0.156555
OsNRT2.4	Os05g0501350	0.156516
OsNRT2.4	Os02g0196600	0.156499
OsNRT2.4	Os10g0431000	0.156461
OsNRT2.4	Os11g0597400	0.156433
OsNRT2.4	Os01g0723100	0.156385
OsNRT2.4	Os01g0555600	0.156202
OsNRT2.4	Os04g0635201	0.155954
OsNRT2.4	Os06g0490000	0.155891
OsNRT2.4	Os06g0612900	0.155731
OsNRT2.4	Os01g0894300	0.155597
OsNRT2.4	Os08g0430000	0.155521
OsNRT2.4	Os01g0948300	0.155468
OsNRT2.4	Os06g0671000	0.15544
OsNRT2.4	Os02g0564700	0.155437
OsNRT2.4	Os10g0194200	0.155327
OsNRT2.4	Os03g0192550	0.155084
OsNRT2.4	Os01g0944200	0.155011
OsNRT2.4	Os02g0458100	0.154969
OsNRT2.4	Os01g0885600	0.154848
OsNRT2.4	Os04g0636200	0.154753
OsNRT2.4	Os03g0791800	0.154701
OsNRT2.4	Os02g0267700	0.154514
OsNRT2.4	Os03g0776100	0.154357
OsNRT2.4	Os01g0653200	0.154345
OsNRT2.4	Os04g0219550	0.154114
OsNRT2.4	Os05g0379500	0.153971
OsNRT2.4	Os03g0741400	0.153961
OsNRT2.4	Os04g0147200	0.153946
OsNRT2.4	Os06g0315900	0.153945
OsNRT2.4	Os02g0808100	0.153888
OsNRT2.4	Os08g0213400	0.153847
OsNRT2.4	Os06g0698600	0.153741
OsNRT2.4	Os04g0531700	0.153703
OsNRT2.4	Os07g0585100	0.1537
OsNRT2.4	Os12g0163700	0.153572
OsNRT2.4	Os08g0486867	0.153567
OsNRT2.4	Os01g0866000	0.153418
OsNRT2.4	Os02g0470400	0.153407
OsNRT2.4	Os03g0366800	0.153339
OsNRT2.4	Os02g0565600	0.153279
OsNRT2.4	Os03g0823000	0.153213
OsNRT2.4	Os04g0639200	0.153187
OsNRT2.4	Os06g0706400	0.153158
OsNRT2.4	Os03g0312600	0.153148
OsNRT2.4	novel.113	0.153115
OsNRT2.4	Os06g0720000	0.153101
OsNRT2.4	Os09g0345600	0.152825
OsNRT2.4	Os08g0220400	0.152685
OsNRT2.4	Os10g0539650	0.152532
OsNRT2.4	Os02g0527800	0.152511
OsNRT2.4	Os04g0403300	0.152491
OsNRT2.4	Os02g0557100	0.152422
OsNRT2.4	Os03g0274800	0.152383
OsNRT2.4	Os01g0846000	0.152366
OsNRT2.4	Os10g0486000	0.152342
OsNRT2.4	Os02g0599700	0.152203
OsNRT2.4	Os02g0264700	0.152178
OsNRT2.4	Os08g0352400	0.152035
OsNRT2.4	Os07g0274100	0.152022
OsNRT2.4	Os02g0814400	0.151936
OsNRT2.4	Os02g0754900	0.151933
OsNRT2.4	Os05g0252100	0.151846
OsNRT2.4	novel.678	0.151807
OsNRT2.4	Os07g0196200	0.151607
OsNRT2.4	Os11g0172350	0.151604
OsNRT2.4	Os07g0538000	0.151588
OsNRT2.4	Os02g0129700	0.151556
OsNRT2.4	Os01g0813400	0.151487
OsNRT2.4	Os10g0202900	0.151453
OsNRT2.4	Os05g0512100	0.151253
OsNRT2.4	Os11g0100100	0.151235
OsNRT2.4	Os08g0400200	0.151164
OsNRT2.4	Os09g0471000	0.151085
OsNRT2.4	Os01g0871800	0.150913
OsNRT2.4	Os05g0104200	0.1509
OsNRT2.4	Os05g0368000	0.150777
OsNRT2.4	Os04g0579200	0.150712
OsNRT2.4	Os07g0434500	0.150594
OsNRT2.4	Os01g0818000	0.150546
OsNRT2.4	Os02g0645600	0.15021
OsNRT2.4	Os05g0335500	0.150181
OsNRT2.4	Os03g0231400	0.150172
OsNRT2.4	Os03g0193075	0.150131
OsNRT2.4	Os11g0151500	0.150075
OsNRT2.4	novel.855	0.150044
OsNRT2.4	Os07g0291400	0.149979
OsNRT2.4	Os03g0745000	0.149861
OsNRT2.4	Os11g0129200	0.149813
OsNRT2.4	Os02g0516400	0.14971
OsNRT2.4	Os02g0718100	0.149569
OsNRT2.4	Os09g0113000	0.149279
OsNRT2.4	Os01g0818000	0.149262
OsNRT2.4	Os08g0406400	0.149087
OsNRT2.4	Os06g0188000	0.14898
OsNRT2.4	Os10g0560450	0.148941
OsNRT2.4	Os05g0565200	0.148891
OsNRT2.4	Os03g0798500	0.148834
OsNRT2.4	Os08g0151800	0.148795
OsNRT2.4	Os02g0498100	0.148623
OsNRT2.4	Os07g0663000	0.148474
OsNRT2.4	Os11g0130600	0.148452
OsNRT2.4	Os03g0259900	0.148415
OsNRT2.4	Os05g0382200	0.148353
OsNRT2.4	Os03g0712700	0.14831
OsNRT2.4	Os03g0248000	0.148296
OsNRT2.4	Os09g0483300	0.148158
OsNRT2.4	Os02g0703600	0.148127
OsNRT2.4	Os05g0127400	0.147972
OsNRT2.4	Os11g0130900	0.147936
OsNRT2.4	Os05g0182550	0.14793
OsNRT2.4	Os03g0772600	0.147902
OsNRT2.4	Os08g0270800	0.147888
OsNRT2.4	Os02g0824500	0.147815
OsNRT2.4	Os02g0690600	0.147716
OsNRT2.4	novel.863	0.147664
OsNRT2.4	Os01g0719300	0.14763
OsNRT2.4	Os10g0136150	0.147411
OsNRT2.4	Os10g0490100	0.147245
OsNRT2.4	Os01g0879300	0.147198
OsNRT2.4	Os12g0118000	0.147167
OsNRT2.4	Os03g0776900	0.147032
OsNRT2.4	novel.1072	0.147006
OsNRT2.4	novel.473	0.147006
OsNRT2.4	novel.1017	0.146913
OsNRT2.4	Os02g0756800	0.1466
OsNRT2.4	Os07g0540500	0.14658
OsNRT2.4	Os05g0272800	0.146408
OsNRT2.4	Os11g0293800	0.146395
OsNRT2.4	Os03g0107600	0.146382
OsNRT2.4	Os12g0472500	0.146375
OsNRT2.4	Os12g0433133	0.146348
OsNRT2.4	Os02g0612700	0.14633
OsNRT2.4	Os03g0796000	0.146278
OsNRT2.4	Os05g0533900	0.146135
OsNRT2.4	Os10g0436800	0.146023
OsNRT2.4	Os12g0117300	0.145904
OsNRT2.4	Os06g0614100	0.145854
OsNRT2.4	Os01g0759200	0.145764
OsNRT2.4	Os02g0589400	0.145392
OsNRT2.4	Os03g0309400	0.145389
OsNRT2.4	Os09g0353700	0.145288
OsNRT2.4	Os04g0684200	0.145237
OsNRT2.4	Os02g0322500	0.145163
OsNRT2.4	novel.311	0.144934
OsNRT2.4	Os08g0432000	0.144649
OsNRT2.4	Os03g0265900	0.144638
OsNRT2.4	Os02g0813000	0.144525
Novel represents a newly discovered gene

## Sheet: Black Module
Supplementary Table S7 Module Network Node Relationships
FromNode	GoNode	Weight
OsNPF4.5	Os03g0766600	0.158607
OsNPF4.5	Os08g0533300	0.15617
OsNPF4.5	Os04g0481800	0.153427
OsNPF4.5	Os08g0480400	0.153196
OsNPF4.5	novel.197	0.150455
OsNPF4.5	Os03g0282100	0.150343
OsNPF4.5	novel.328	0.149357
OsNPF4.5	Os01g0881900	0.147766
OsNPF4.5	Os11g0112000	0.147156
OsNPF4.5	Os09g0242800	0.14712
OsNPF4.5	Os01g0906000	0.146123
OsNPF4.5	Os04g0403900	0.145613
OsNPF4.5	Os07g0192700	0.14464
OsNPF4.5	Os06g0592500	0.143927
OsNPF4.5	Os05g0218981	0.142312
OsNPF4.5	novel.273	0.141828
OsNPF4.5	Os11g0535600	0.141748
OsNPF4.5	Os07g0160300	0.141311
OsNPF4.5	Os06g0271600	0.141273
OsNPF4.5	Os05g0387300	0.140137
OsNPF4.5	Os08g0400300	0.139866
OsNPF4.5	Os04g0655400	0.139772
OsNPF4.5	Os04g0249600	0.139709
OsNPF4.5	Os09g0243200	0.139589
OsNPF4.5	Os01g0800900	0.138964
OsNPF4.5	Os07g0673200	0.138341
OsNPF4.5	Os03g0725200	0.137994
OsNPF4.5	Os03g0803300	0.136561
OsNPF4.5	Os07g0593000	0.13571
Os01g0902800	Os10g0407200	0.33915
Os01g0902800	Os03g0305400	0.333149
Os01g0902800	Os03g0654900	0.331848
Os01g0902800	Os01g0944100	0.328907
Os01g0902800	Os06g0662550	0.324499
Os01g0902800	Os04g0371200	0.323197
Os01g0902800	Os09g0564800	0.322014
Os01g0902800	Os03g0185000	0.321888
Os01g0902800	Os07g0192700	0.320688
Os01g0902800	novel.41	0.320643
Os01g0902800	Os06g0104900	0.320129
Os01g0902800	Os08g0497600	0.319419
Os01g0902800	novel.273	0.317916
Os01g0902800	Os07g0192550	0.317496
Os01g0902800	Os03g0619875	0.31563
Os01g0902800	Os04g0480100	0.315021
Os01g0902800	Os10g0161400	0.314939
Os01g0902800	Os03g0206300	0.313284
Os01g0902800	novel.1191	0.311563
Os01g0902800	Os03g0172100	0.309347
Os01g0902800	Os08g0534300	0.306717
Os01g0902800	Os06g0724900	0.306582
Os01g0902800	Os11g0264500	0.306223
Os01g0902800	Os09g0425500	0.306136
Os01g0902800	novel.197	0.305992
Os01g0902800	Os10g0159033	0.305536
Os01g0902800	Os03g0432277	0.305256
Os01g0902800	Os05g0548300	0.305241
Os01g0902800	Os04g0403900	0.304933
Os01g0902800	Os08g0138900	0.304158
Os01g0902800	Os03g0724500	0.304005
Os01g0902800	Os09g0471000	0.303197
Os01g0902800	Os12g0197100	0.302876
Os01g0902800	Os02g0649800	0.302418
Os01g0902800	Os08g0480400	0.302277
Os01g0902800	novel.745	0.302093
Os01g0902800	Os06g0272800	0.301896
Os01g0902800	Os06g0162500	0.301628
Os01g0902800	Os02g0510300	0.301353
Os01g0902800	Os08g0425500	0.301332
Os01g0902800	Os01g0937500	0.300563
Os01g0902800	Os03g0765500	0.300026
Os01g0902800	Os02g0305950	0.299997
Os01g0902800	Os02g0587300	0.29994
Os01g0902800	Os07g0613600	0.299526
Os01g0902800	Os06g0610100	0.299173
Os01g0902800	Os05g0372800	0.298244
Os01g0902800	Os12g0500500	0.297709
Os01g0902800	Os05g0526200	0.297262
Os01g0902800	Os05g0533500	0.296295
Os01g0902800	Os05g0218981	0.29549
Os01g0902800	Os05g0577700	0.294868
Os01g0902800	Os06g0191200	0.294791
Os01g0902800	Os08g0534950	0.294695
Os01g0902800	Os03g0766600	0.294211
Os01g0902800	Os04g0655400	0.293972
Os01g0902800	Os10g0341750	0.293928
Os01g0902800	Os02g0802575	0.293913
Os01g0902800	Os07g0194500	0.293524
Os01g0902800	Os03g0850400	0.29344
Os01g0902800	Os09g0345700	0.293365
Os01g0902800	Os06g0304700	0.293116
Os01g0902800	Os04g0375300	0.291723
Os01g0902800	Os10g0186200	0.291136
Os01g0902800	Os07g0588600	0.290957
Os01g0902800	Os07g0123900	0.290051
Os01g0902800	Os10g0464500	0.290015
Os01g0902800	Os04g0481800	0.289293
Os01g0902800	Os03g0100030	0.289033
Os01g0902800	Os07g0673200	0.288399
Os01g0902800	Os04g0404000	0.288301
Os01g0902800	Os05g0215700	0.287907
Os01g0902800	Os03g0655100	0.287013
Os01g0902800	Os02g0208675	0.286808
Os01g0902800	Os12g0489800	0.286632
Os01g0902800	Os07g0668500	0.286158
Os01g0902800	Os02g0130300	0.285848
Os01g0902800	Os07g0124100	0.285653
Os01g0902800	Os06g0271600	0.285541
Os01g0902800	novel.887	0.285261
Os01g0902800	Os07g0674800	0.284951
Os01g0902800	Os03g0803300	0.284815
Os01g0902800	Os07g0585600	0.28461
Os01g0902800	Os06g0707300	0.284554
Os01g0902800	Os05g0404700	0.284122
Os01g0902800	Os03g0643250	0.284107
Os01g0902800	Os10g0539200	0.283594
Os01g0902800	Os03g0810300	0.283326
Os01g0902800	Os07g0593000	0.283184
Os01g0902800	Os11g0160300	0.283041
Os01g0902800	Os04g0463300	0.282968
Os01g0902800	Os03g0857750	0.282071
Os01g0902800	Os03g0760700	0.281724
Os01g0902800	Os05g0405600	0.281619
Os01g0902800	Os04g0505700	0.281617
Os01g0902800	Os05g0424700	0.281116
Os01g0902800	Os11g0265850	0.280825
Os01g0902800	Os04g0458600	0.280805
Os01g0902800	Os09g0243200	0.280158
Os01g0902800	Os11g0112000	0.279733
Os01g0902800	Os06g0235200	0.279526
Os01g0902800	Os07g0673900	0.279271
Os01g0902800	Os03g0282100	0.278874
Os01g0902800	Os06g0542150	0.278326
Os01g0902800	Os04g0387300	0.277983
Os01g0902800	Os04g0249600	0.277722
Os01g0902800	Os03g0169400	0.277642
Os01g0902800	Os12g0166600	0.276989
Os01g0902800	Os09g0242800	0.276938
Os01g0902800	novel.328	0.276889
Os01g0902800	Os03g0725200	0.276885
Os01g0902800	Os08g0533300	0.276378
Os01g0902800	Os12g0246700	0.276083
Os01g0902800	Os07g0530600	0.276043
Os01g0902800	Os01g0906000	0.275728
Os01g0902800	novel.95	0.275467
Os01g0902800	Os04g0634800	0.27531
Os01g0902800	Os02g0634100	0.275088
Os01g0902800	Os08g0159500	0.274784
Os01g0902800	Os11g0550900	0.27423
Os01g0902800	Os04g0664800	0.274202
Os01g0902800	Os06g0591600	0.274194
Os01g0902800	Os04g0645500	0.273618
Os01g0902800	Os08g0458200	0.273159
Os01g0902800	Os04g0270900	0.272561
Os01g0902800	Os07g0438600	0.271438
Os01g0902800	Os03g0765400	0.27119
Os01g0902800	Os11g0623700	0.270693
Os01g0902800	Os08g0533450	0.269453
Os01g0902800	Os12g0111600	0.269115
Os01g0902800	Os07g0182000	0.268181
Os01g0902800	Os10g0520700	0.267991
Os01g0902800	Os11g0157600	0.26762
Os01g0902800	Os03g0238600	0.267411
Os01g0902800	Os09g0480600	0.267323
Os01g0902800	Os03g0584400	0.266878
Os01g0902800	Os04g0581700	0.266217
Os01g0902800	Os08g0529000	0.26597
Os01g0902800	Os08g0400300	0.265548
Os01g0902800	Os08g0531300	0.26524
Os01g0902800	Os03g0182800	0.265048
Os01g0902800	novel.153	0.264148
Os01g0902800	Os12g0615500	0.263914
Os01g0902800	Os09g0459900	0.263585
Os01g0902800	Os04g0489100	0.263315
Os01g0902800	Os03g0399800	0.262895
Os01g0902800	Os07g0422100	0.262819
Os01g0902800	Os03g0583000	0.262763
Os01g0902800	Os05g0433600	0.261858
Os01g0902800	Os07g0160300	0.261614
Os01g0902800	Os03g0285300	0.261489
Os01g0902800	Os06g0142400	0.261425
Os01g0902800	novel.44	0.261367
Os01g0902800	Os05g0186300	0.261236
Os01g0902800	Os08g0128000	0.260448
Os01g0902800	Os03g0599000	0.259178
Os01g0902800	Os09g0459900	0.258808
Os01g0902800	Os03g0360800	0.258392
Os01g0902800	novel.1052	0.257345
Os01g0902800	Os03g0792400	0.257066
Os01g0902800	Os05g0145000	0.256047
Os01g0902800	Os03g0150200	0.25531
Os01g0902800	Os11g0535600	0.255142
Os01g0902800	Os05g0195200	0.254805
Os01g0902800	Os11g0276300	0.254112
Os01g0902800	Os04g0304750	0.253575
Os01g0902800	Os02g0601500	0.253542
Os01g0902800	Os11g0428800	0.253232
Os01g0902800	Os04g0635350	0.253019
Os01g0902800	Os05g0387300	0.252596
Os01g0902800	Os11g0212100	0.252582
Os01g0902800	Os07g0585000	0.252315
Os01g0902800	Os06g0592500	0.251966
Os01g0902800	novel.40	0.251606
Os01g0902800	novel.850	0.250049
Os01g0902800	Os04g0268700	0.249588
Os01g0902800	Os05g0555600	0.249342
Os01g0902800	Os07g0659400	0.249155
Os01g0902800	Os06g0247500	0.249115
Os01g0902800	Os01g0970600	0.248898
Os01g0902800	Os12g0442800	0.248425
Os01g0902800	Os06g0141700	0.24822
Os01g0902800	Os02g0191000	0.247249
Os01g0902800	Os04g0497350	0.247238
Os01g0902800	Os09g0564600	0.247143
Os01g0902800	Os07g0543000	0.246886
Os01g0902800	Os04g0612700	0.24673
Os01g0902800	Os03g0169500	0.245508
Os01g0902800	Os04g0191800	0.245391
Os01g0902800	Os03g0709200	0.244415
Os01g0902800	Os06g0665500	0.243932
Os01g0902800	Os10g0553800	0.243778
Os01g0902800	Os08g0462800	0.243608
Os01g0902800	Os07g0653900	0.242166
Os01g0902800	Os06g0247651	0.241814
Os01g0902800	Os08g0345700	0.241246
Os01g0902800	Os04g0411800	0.24119
Os01g0902800	Os09g0483600	0.241169
Os01g0902800	Os05g0554000	0.241123
Os01g0902800	Os09g0560900	0.241081
Os01g0902800	Os10g0116800	0.240869
Os01g0902800	Os10g0340301	0.240731
Os01g0902800	Os05g0269200	0.239757
Os01g0902800	Os01g0918300	0.23886
Os01g0902800	Os04g0504000	0.238715
Os01g0902800	Os02g0779300	0.238597
Os01g0902800	Os02g0620500	0.238328
Os01g0902800	Os08g0440100	0.238149
Os01g0902800	novel.1008	0.237938
Os01g0902800	novel.119	0.237809
Os01g0902800	Os07g0167100	0.23777
Os01g0902800	novel.238	0.237735
Os01g0902800	Os02g0173650	0.237623
Os01g0902800	Os04g0544000	0.237419
Os01g0902800	Os06g0536100	0.236961
Os01g0902800	Os02g0247800	0.236743
Os01g0902800	Os03g0341000	0.236127
Os01g0902800	Os07g0190800	0.235988
Os01g0902800	Os03g0855500	0.235476
Os01g0902800	Os03g0182900	0.234958
Os01g0902800	Os11g0609600	0.234846
Os01g0902800	Os02g0178600	0.234362
Os01g0902800	Os08g0111200	0.233701
Os01g0902800	Os06g0226950	0.23349
Os01g0902800	Os07g0223766	0.233221
Os01g0902800	Os05g0185800	0.232714
Os01g0902800	Os04g0674400	0.232598
Os01g0902800	Os05g0472300	0.231919
Os01g0902800	Os08g0530000	0.230992
Os01g0902800	Os03g0597450	0.230048
Os01g0902800	novel.777	0.229521
Os01g0902800	novel.997	0.229335
Os01g0902800	Os11g0490100	0.229034
Os01g0902800	Os04g0678400	0.228337
Os01g0902800	Os04g0590400	0.228209
Os01g0902800	Os10g0517050	0.227968
Os01g0902800	Os05g0474500	0.227257
Os01g0902800	Os09g0564700	0.226868
Os01g0902800	Os08g0497900	0.22671
Os01g0902800	Os03g0747800	0.226698
Os01g0902800	Os02g0262800	0.226233
Os01g0902800	Os07g0143600	0.226159
Os01g0902800	Os03g0227800	0.22571
Os01g0902800	Os08g0522500	0.225668
Os01g0902800	Os10g0495000	0.22555
Os01g0902800	Os09g0491596	0.225438
Os01g0902800	Os08g0549200	0.225382
Os01g0902800	novel.1079	0.225205
Os01g0902800	Os05g0573000	0.224587
Os01g0902800	Os02g0597700	0.224041
Os01g0902800	novel.20	0.22401
Os01g0902800	Os08g0135100	0.223791
Os01g0902800	Os01g0926600	0.223701
Os01g0902800	Os05g0469600	0.22363
Os01g0902800	Os03g0599600	0.223386
Os01g0902800	Os09g0393200	0.223169
Os01g0902800	Os03g0277700	0.222905
Os01g0902800	Os06g0181200	0.222445
Os01g0902800	Os06g0142200	0.222272
Os01g0902800	Os11g0475200	0.222096
Os01g0902800	Os03g0839300	0.222077
Os01g0960900	Os04g0476000	0.268142
Os01g0960900	Os04g0585900	0.265961
Os01g0960900	Os03g0177000	0.26491
Os01g0960900	Os05g0487300	0.259172
Os01g0960900	Os02g0195300	0.258907
Os01g0960900	Os01g0965900	0.254135
Os01g0960900	Os03g0426300	0.253937
Os01g0960900	Os04g0619000	0.25327
Os01g0960900	Os03g0326500	0.252928
Os01g0960900	Os05g0522500	0.252174
Os01g0960900	novel.28	0.2518
Os01g0960900	Os06g0683800	0.249922
Os01g0960900	Os05g0411600	0.24879
Os01g0960900	Os11g0539800	0.245994
Os01g0960900	Os03g0243300	0.243435
Os01g0960900	Os03g0682600	0.243212
Os01g0960900	Os02g0104150	0.24241
Os01g0960900	Os04g0150500	0.242375
Os01g0960900	Os02g0771400	0.238177
Os01g0960900	Os02g0682300	0.237594
Os01g0960900	novel.997	0.236557
Os01g0960900	novel.330	0.236546
Os01g0960900	Os04g0674400	0.235865
Os01g0960900	Os03g0341000	0.235724
Os01g0960900	Os06g0264650	0.235371
Os01g0960900	Os03g0318500	0.235118
Os01g0960900	Os08g0111200	0.235019
Os01g0960900	Os08g0546800	0.234708
Os01g0960900	Os05g0469800	0.234237
Os01g0960900	Os12g0410150	0.234208
Os01g0960900	novel.1008	0.233822
Os01g0960900	Os09g0337300	0.233737
Os01g0960900	Os03g0820500	0.233736
Os01g0960900	Os08g0530000	0.233531
Os01g0960900	Os10g0538600	0.233381
Os01g0960900	Os06g0693100	0.233223
Os01g0960900	Os02g0259100	0.233213
Os01g0960900	Os11g0164200	0.233121
Os01g0960900	Os08g0300200	0.233114
Os01g0960900	Os03g0183600	0.232965
Os01g0960900	Os09g0279800	0.232685
Os01g0960900	Os09g0372700	0.23258
Os01g0960900	Os10g0525500	0.232438
Os01g0960900	Os08g0549200	0.232331
Os01g0960900	Os03g0788700	0.232243
Os01g0960900	Os08g0476100	0.231865
Os01g0960900	Os05g0256100	0.231508
Os01g0960900	Os11g0138300	0.231453
Os01g0960900	Os03g0293600	0.231318
Os01g0960900	Os10g0327000	0.231314
Os01g0960900	Os04g0411651	0.23108
Os01g0960900	Os12g0582800	0.231071
Os01g0960900	Os12g0236400	0.231067
Os01g0960900	Os09g0314800	0.230831
Os01g0960900	Os02g0813350	0.230715
Os01g0960900	Os06g0275700	0.230707
Os01g0960900	Os02g0286891	0.230665
Os01g0960900	Os02g0104100	0.230539
Os01g0960900	Os09g0471150	0.230239
Os01g0960900	Os03g0160000	0.230113
Os01g0960900	Os07g0190800	0.230093
Os01g0960900	Os12g0286600	0.230045
Os01g0960900	Os04g0618950	0.229981
Os01g0960900	Os08g0455900	0.229903
Os01g0960900	Os10g0541200	0.229849
Os01g0960900	Os06g0501900	0.229845
Os01g0960900	Os03g0743900	0.229752
Os01g0960900	Os03g0810700	0.229641
Os01g0960900	Os05g0113000	0.229386
Os01g0960900	Os03g0255900	0.229171
Os01g0960900	Os02g0727200	0.228872
Os01g0960900	Os09g0415050	0.228788
Os01g0960900	novel.670	0.228767
Os01g0960900	Os06g0173100	0.22864
Os01g0960900	Os05g0269200	0.228606
Os01g0960900	Os09g0371100	0.228537
Os01g0960900	Os05g0481500	0.228479
Os01g0960900	Os05g0551000	0.228469
Os01g0960900	Os04g0612700	0.228423
Os01g0960900	Os08g0356500	0.228348
Os01g0960900	Os04g0607400	0.228338
Os01g0960900	Os07g0638400	0.228267
Os01g0960900	Os06g0668200	0.228147
Os01g0960900	Os02g0464550	0.22791
Os01g0960900	Os11g0602750	0.227844
Os01g0960900	novel.256	0.227775
Os01g0960900	Os08g0176633	0.227696
Os01g0960900	Os02g0618100	0.227594
Os01g0960900	Os02g0664400	0.227577
Os01g0960900	Os08g0428100	0.227404
Os01g0960900	Os08g0481800	0.227383
Os01g0960900	Os05g0525900	0.227264
Os01g0960900	Os02g0811800	0.227136
Os01g0960900	Os07g0273301	0.227123
Os01g0960900	Os08g0559501	0.226938
Os01g0960900	Os11g0543100	0.226931
Os01g0960900	Os09g0483500	0.226768
Os01g0960900	Os04g0645600	0.226762
Os01g0960900	Os06g0669700	0.226743
Os01g0960900	Os02g0200000	0.226581
Os01g0960900	novel.467	0.22656
Os01g0960900	Os05g0362100	0.226557
Os01g0960900	Os05g0495100	0.226486
Os01g0960900	novel.889	0.226459
Os01g0960900	Os04g0664800	0.226274
Os01g0960900	Os12g0157200	0.226179
Os01g0960900	Os02g0713400	0.225946
Os01g0960900	Os06g0602800	0.22566
Os01g0960900	Os05g0469600	0.225624
Os01g0960900	Os09g0393200	0.225544
Os01g0960900	Os12g0442800	0.225295
Os01g0960900	Os06g0142300	0.225286
Os01g0960900	Os04g0475900	0.225239
Os01g0960900	Os11g0184900	0.225132
Os01g0960900	novel.565	0.225025
Os01g0960900	Os10g0511400	0.224951
Os01g0960900	Os07g0622900	0.224893
Os01g0960900	Os08g0345700	0.224609
Os01g0960900	novel.1103	0.224538
Os01g0960900	Os09g0543100	0.224188
Os01g0960900	Os05g0424700	0.224144
Os01g0960900	Os12g0138050	0.224128
Os01g0960900	Os09g0415800	0.22402
Os01g0960900	Os04g0643100	0.224015
Os01g0960900	Os04g0544000	0.223901
Os01g0960900	Os06g0649900	0.223822
Os01g0960900	Os04g0383700	0.223707
Os01g0960900	Os11g0245800	0.223659
Os01g0960900	Os06g0192600	0.223623
Os01g0960900	Os02g0696500	0.22357
Os01g0960900	Os03g0180400	0.223366
Os01g0960900	Os12g0586100	0.223313
Os01g0960900	Os11g0602800	0.223263
Os01g0960900	Os11g0648100	0.223151
Os01g0960900	Os03g0857750	0.223103
Os01g0960900	Os06g0520733	0.223081
Os01g0960900	Os07g0695900	0.222931
Os01g0960900	Os03g0828500	0.222881
Os01g0960900	Os12g0579450	0.222546
Os01g0960900	Os06g0146700	0.222532
Os01g0960900	Os09g0558100	0.222303
Os01g0960900	Os03g0794400	0.222181
Os01g0960900	Os07g0539400	0.222174
Os01g0960900	Os02g0183900	0.222138
Os01g0960900	Os03g0724100	0.221938
Os01g0960900	Os08g0514300	0.221836
Os01g0960900	Os03g0145900	0.221824
Os01g0960900	Os04g0387300	0.221809
Os01g0960900	Os05g0501200	0.221761
Os01g0960900	Os06g0699900	0.221361
Os01g0960900	Os05g0344200	0.221345
Os01g0960900	Os05g0304400	0.221316
Os01g0960900	Os08g0155900	0.221051
Os01g0960900	Os06g0202300	0.221001
Os01g0960900	Os03g0747800	0.220855
Os01g0960900	Os07g0181800	0.220789
Os01g0960900	Os04g0411800	0.220789
Os01g0960900	Os09g0375900	0.220686
Os01g0960900	Os10g0184300	0.220564
Os01g0960900	Os12g0610300	0.220419
Os01g0960900	Os06g0318200	0.220319
Os01g0960900	Os02g0621700	0.220189
Os01g0960900	Os02g0751800	0.220058
Os01g0960900	Os03g0209800	0.220053
Os01g0960900	Os08g0155100	0.219923
Os01g0960900	Os08g0522500	0.219674
Os01g0960900	Os02g0807300	0.219571
Os01g0960900	Os06g0691100	0.219533
Os01g0960900	Os08g0557400	0.219226
Os01g0960900	Os02g0704600	0.219191
Os01g0960900	Os02g0121600	0.219179
Os01g0960900	Os03g0217200	0.219156
Os01g0960900	Os02g0564000	0.219134
Os01g0960900	Os06g0274500	0.219052
Os01g0960900	Os05g0194900	0.218835
Os01g0960900	Os03g0856100	0.218793
Os01g0960900	Os04g0692200	0.218654
Os01g0960900	Os09g0428000	0.218549
Os01g0960900	Os07g0609100	0.218381
Os01g0960900	Os03g0448700	0.21838
Os01g0960900	Os04g0654400	0.218193
Os01g0960900	Os02g0533800	0.218064
Os01g0960900	Os07g0661100	0.218038
Os01g0960900	Os03g0839300	0.21786
Os01g0960900	Os02g0159400	0.217676
Os01g0960900	Os05g0185800	0.217618
Os01g0960900	Os06g0199000	0.217544
Os01g0960900	Os02g0828200	0.217526
Os01g0960900	Os11g0428800	0.217479
Os01g0960900	Os02g0234300	0.217385
Os01g0960900	Os04g0109500	0.217306
Os01g0960900	Os02g0657700	0.217219
Os01g0960900	Os12g0639200	0.21707
Os01g0960900	Os11g0157400	0.217016
Os01g0960900	Os02g0527200	0.216875
Os01g0960900	Os03g0561400	0.216664
Os01g0960900	Os04g0412100	0.216644
Os01g0960900	Os12g0250700	0.216638
Os01g0960900	Os12g0105700	0.21656
Os01g0960900	Os06g0496400	0.216494
Os01g0960900	Os05g0472500	0.216449
Os01g0960900	Os05g0406150	0.216299
Os01g0960900	Os10g0546900	0.216205
Os01g0960900	Os11g0160300	0.216138
Os01g0960900	novel.785	0.216053
Os01g0960900	Os02g0740600	0.215969
Os01g0960900	Os03g0318150	0.215965
Os01g0960900	Os06g0210500	0.215569
Os01g0960900	Os11g0457700	0.215539
Os01g0960900	Os11g0153400	0.215354
Os01g0960900	Os07g0647100	0.215274
Os01g0960900	Os02g0259600	0.215266
Os01g0960900	Os05g0213900	0.215221
Os01g0960900	Os11g0551800	0.215144
Os01g0960900	Os08g0128000	0.215106
Os01g0960900	novel.783	0.215098
Os01g0960900	Os10g0553800	0.215022
Os01g0960900	Os10g0155500	0.214997
Os01g0960900	Os10g0538950	0.214916
Os01g0960900	Os05g0401000	0.21486
Os01g0960900	Os04g0369000	0.21479
Os01g0960900	Os04g0675400	0.214702
Os01g0960900	Os12g0105500	0.21465
Os01g0960900	novel.903	0.21452
Os01g0960900	Os11g0498600	0.214337
Os01g0960900	Os12g0581900	0.21414
Os01g0960900	Os07g0250501	0.214063
Os01g0960900	Os02g0794000	0.214037
Os01g0960900	Os11g0157600	0.213994
Os01g0960900	Os09g0491756	0.213948
Os01g0960900	Os02g0527600	0.213868
Os01g0960900	Os05g0313100	0.213442
Os01g0960900	Os10g0580500	0.213409
Os01g0960900	Os02g0159700	0.213398
Os01g0960900	novel.55	0.213392
Os01g0960900	Os07g0182000	0.213314
Os01g0960900	Os04g0458600	0.213278
Os01g0960900	Os03g0810750	0.213152
Os01g0960900	Os08g0520600	0.213142
Os01g0960900	Os03g0713600	0.213111
Os01g0960900	Os08g0139100	0.213104
Os01g0960900	Os08g0113900	0.213071
Os01g0960900	Os08g0455600	0.21303
Os01g0960900	novel.277	0.212951
Os01g0960900	Os05g0405600	0.212941
Os01g0960900	Os03g0724500	0.212893
Os01g0960900	Os11g0113100	0.212841
Os01g0960900	novel.619	0.212818
Os01g0960900	Os08g0540300	0.212605
Os01g0960900	Os11g0102700	0.212496
Os01g0960900	Os03g0143300	0.212437
Os01g0960900	Os06g0142350	0.212349
Os01g0960900	Os03g0690000	0.212272
Os01g0960900	Os08g0421900	0.212261
Os01g0960900	Os10g0535600	0.212216
Os01g0960900	Os10g0407000	0.212191
Os01g0960900	Os06g0105100	0.212043
Os01g0960900	Os06g0667300	0.211971
Os01g0960900	Os03g0432277	0.211969
Os01g0960900	Os04g0665800	0.211934
Os01g0960900	Os03g0289100	0.211923
Os01g0960900	Os12g0615500	0.211783
Os01g0960900	Os06g0212600	0.211747
Os01g0960900	Os10g0548100	0.211702
Os01g0960900	novel.34	0.211587
Os01g0960900	novel.360	0.211566
Os01g0960900	Os07g0638500	0.211454
Os01g0960900	Os03g0765400	0.211375
Os01g0960900	Os06g0704800	0.211262
Os01g0960900	Os02g0635000	0.211083
Os01g0960900	Os03g0322600	0.211025
Os01g0960900	Os11g0524601	0.210981
Os01g0960900	Os12g0595000	0.210886
Os01g0960900	Os04g0431300	0.210749
Os01g0960900	Os03g0238600	0.210657
Os01g0960900	Os08g0545700	0.210631
Os01g0960900	Os12g0134200	0.210614
Os01g0960900	novel.1028	0.210603
Os01g0960900	Os08g0557900	0.210414
Os03g0235700	Os05g0411600	0.24922
Os03g0235700	Os04g0643100	0.240642
Os03g0235700	Os11g0157400	0.240425
Os03g0235700	Os09g0375900	0.240391
Os03g0235700	Os08g0530000	0.23613
Os03g0235700	Os03g0341000	0.235996
Os03g0235700	Os07g0190800	0.23568
Os03g0235700	Os04g0674400	0.232472
Os03g0235700	Os08g0428100	0.23214
Os03g0235700	Os12g0410150	0.227194
Os03g0235700	Os03g0857750	0.22642
Os03g0235700	novel.997	0.224037
Os03g0235700	Os04g0476000	0.222964
Os03g0235700	Os03g0724100	0.222393
Os03g0235700	Os04g0387300	0.221195
Os03g0235700	Os11g0539800	0.220474
Os03g0235700	Os05g0469800	0.220322
Os03g0235700	novel.330	0.219982
Os03g0235700	Os12g0615500	0.219062
Os03g0235700	novel.1008	0.218406
Os03g0235700	Os03g0318500	0.218299
Os03g0235700	Os04g0664800	0.217929
Os03g0235700	Os05g0424700	0.217713
Os03g0235700	Os06g0264650	0.216519
Os03g0235700	Os03g0326500	0.215318
Os03g0235700	Os06g0192600	0.214817
Os03g0235700	Os08g0522500	0.213551
Os03g0235700	Os05g0522500	0.213151
Os03g0235700	Os08g0345700	0.21179
Os03g0235700	Os05g0269200	0.211432
Os03g0235700	Os08g0549200	0.210927
Os03g0235700	Os09g0314800	0.210639
Os03g0235700	Os04g0544000	0.210147
Os03g0235700	Os06g0542150	0.207688
Os03g0235700	Os03g0788700	0.207344
Os03g0235700	Os12g0442800	0.20713
Os03g0235700	Os05g0469600	0.206674
Os03g0235700	Os03g0747800	0.206212
Os03g0235700	Os06g0668200	0.206031
Os03g0235700	Os03g0810700	0.205813
Os03g0235700	Os12g0236400	0.205801
Os03g0235700	Os08g0185701	0.204733
Os03g0235700	Os03g0243300	0.204211
Os03g0235700	Os03g0724500	0.203909
Os03g0235700	Os05g0113000	0.203473
Os03g0235700	Os05g0256100	0.203292
Os03g0235700	Os06g0602800	0.202876
Os03g0235700	Os04g0619000	0.202384
Os03g0235700	Os03g0426300	0.20226
Os03g0235700	Os03g0432277	0.202115
Os03g0235700	Os05g0362100	0.201698
Os03g0235700	Os12g0581900	0.20162
Os03g0235700	Os04g0458600	0.200913
Os03g0235700	Os11g0160300	0.199085
Os03g0235700	Os10g0161400	0.198994
Os03g0235700	Os04g0612700	0.198544
Os03g0235700	Os03g0743900	0.198391
Os03g0235700	Os08g0128000	0.196359
Os03g0235700	Os12g0582800	0.195964
Os03g0235700	Os09g0393200	0.19518
Os03g0235700	Os06g0683800	0.193981
Os03g0235700	Os06g0274500	0.193598
Os03g0235700	novel.28	0.193573
Os03g0235700	Os05g0372800	0.193541
Os03g0235700	Os08g0481800	0.193237
Os03g0235700	Os08g0476100	0.19312
Os03g0235700	Os07g0661100	0.192875
Os03g0235700	Os06g0104900	0.19282
Os03g0235700	Os04g0411800	0.192097
Os03g0235700	Os07g0123900	0.19133
Os03g0235700	Os04g0150500	0.191305
Os03g0235700	Os08g0546800	0.190518
Os03g0235700	Os04g0585900	0.190122
Os03g0235700	Os11g0428800	0.189943
Os03g0235700	Os07g0181800	0.189654
Os03g0235700	Os11g0138300	0.189589
Os03g0235700	Os09g0415800	0.189535
Os03g0235700	Os11g0551800	0.188269
Os03g0235700	Os05g0548300	0.188146
Os03g0235700	Os05g0185800	0.187666
Os03g0235700	Os05g0551000	0.187473
Os03g0235700	Os06g0173100	0.187244
Os03g0235700	Os06g0669700	0.186858
Os03g0235700	Os07g0273301	0.186845
Os03g0235700	Os05g0405600	0.185244
Os03g0235700	Os05g0495100	0.185086
Os03g0235700	Os09g0372700	0.184752
Os03g0235700	Os06g0649900	0.184608
Os03g0235700	Os10g0553800	0.184235
Os03g0235700	Os11g0602750	0.18326
Os03g0235700	Os11g0157600	0.182521
Os03g0235700	Os07g0182000	0.182336
Os03g0235700	Os05g0487300	0.181413
Os03g0235700	Os04g0480100	0.181011
Os03g0235700	Os11g0164200	0.180847
Os03g0235700	Os08g0176633	0.180767
Os03g0235700	Os03g0619875	0.180423
Os03g0235700	novel.467	0.180264
Os03g0235700	Os08g0559501	0.180233
Os03g0235700	Os04g0645600	0.179424
Os03g0235700	Os12g0286600	0.179384
Os03g0235700	Os06g0718400	0.178612
Os03g0235700	Os07g0530600	0.178045
Os03g0235700	Os09g0279800	0.177545
Os03g0235700	Os03g0360800	0.1774
Os03g0235700	Os04g0371200	0.17694
Os03g0235700	Os12g0450300	0.176718
Os03g0235700	Os06g0142300	0.176257
Os03g0235700	Os11g0245800	0.175798
Os03g0235700	Os12g0105700	0.17571
Os03g0235700	Os10g0407200	0.175533
Os03g0235700	Os08g0296600	0.174846
Os03g0235700	Os07g0601600	0.174015
Os03g0235700	Os03g0238600	0.173952
Os03g0235700	Os07g0613600	0.173464
Os03g0235700	Os11g0184900	0.172154
Os03g0235700	Os07g0673900	0.171937
Os03g0235700	Os03g0597450	0.171701
Os03g0235700	Os04g0291100	0.171647
Os03g0235700	Os10g0539200	0.171645
Os03g0235700	Os06g0693100	0.171337
Os03g0235700	Os09g0297000	0.17132
Os03g0235700	Os07g0638400	0.171182
Os03g0235700	Os10g0520700	0.170659
Os03g0235700	Os03g0682600	0.170416
Os03g0235700	Os04g0489100	0.170411
Os03g0235700	Os09g0471150	0.170216
Os03g0235700	Os11g0543100	0.170063
Os03g0235700	Os03g0654900	0.169431
Os03g0235700	Os08g0458200	0.169162
Os03g0235700	Os03g0255900	0.168709
Os03g0235700	Os03g0839300	0.168557
Os03g0235700	Os08g0550400	0.168436
Os03g0235700	Os10g0525500	0.168175
Os03g0235700	novel.793	0.16804
Os03g0235700	Os09g0558100	0.168033
Os03g0235700	Os04g0643300	0.167283
Os03g0235700	Os11g0303400	0.167183
Os03g0235700	Os11g0550900	0.166879
Os03g0235700	Os06g0707300	0.166774
Os03g0235700	Os09g0415050	0.166301
Os03g0235700	novel.55	0.166122
Os03g0235700	Os06g0142350	0.165938
Os03g0235700	Os10g0541200	0.165934
Os03g0235700	Os11g0102700	0.165864
Os03g0235700	Os06g0548200	0.165588
Os03g0235700	Os05g0342900	0.165475
Os03g0235700	Os03g0285300	0.165266
Os03g0235700	novel.1095	0.165027
Os03g0235700	novel.447	0.164925
Os03g0235700	Os07g0661700	0.164742
Os03g0235700	Os11g0275800	0.164545
Os03g0235700	Os06g0142400	0.164439
Os03g0235700	Os06g0591200	0.164214
Os03g0235700	Os09g0491756	0.163404
Os03g0235700	Os06g0275700	0.163151
Os03g0235700	Os07g0622900	0.162974
Os03g0235700	Os03g0760700	0.162592
Os03g0235700	Os09g0425500	0.162224
Os03g0235700	Os07g0532800	0.162141
Os03g0235700	Os05g0525900	0.161988
Os03g0235700	Os04g0381600	0.16192
Os03g0235700	Os04g0411651	0.161445
Os03g0235700	Os11g0170300	0.161391
Os03g0235700	Os05g0186300	0.161236
Os03g0235700	Os06g0708600	0.161229
Os03g0235700	Os04g0648200	0.160865
Os03g0235700	Os08g0135100	0.160834
Os03g0235700	Os04g0504000	0.160796
Os03g0235700	Os10g0446200	0.160442
Os03g0235700	Os07g0585600	0.160398
Os03g0235700	Os05g0526200	0.159767
Os03g0235700	Os07g0674800	0.159719
Os03g0235700	novel.277	0.159636
Os03g0235700	novel.425	0.159617
Os03g0235700	Os11g0609600	0.159467
Os03g0235700	Os06g0699900	0.159052
Os03g0235700	Os08g0499532	0.15894
Os03g0235700	Os05g0554000	0.158563
Os03g0235700	Os06g0203800	0.15846
Os03g0235700	Os09g0459900	0.158261
Os03g0235700	Os09g0337300	0.158033
Os03g0235700	Os04g0268700	0.15782
Os03g0235700	Os09g0371100	0.157779
Os03g0235700	Os05g0176600	0.157698
Os03g0235700	Os04g0635100	0.157527
Os03g0235700	Os03g0599600	0.157489
Os03g0235700	novel.44	0.157445
Os03g0235700	Os09g0480600	0.157383
Os03g0235700	Os10g0392900	0.157102
Os03g0235700	Os09g0543100	0.157055
Os03g0235700	Os06g0162500	0.156753
Os03g0235700	Os05g0401000	0.156409
Os03g0235700	Os03g0305400	0.156299
Os03g0235700	Os06g0672400	0.156253
Os03g0235700	Os07g0609100	0.156242
Os03g0235700	Os08g0421900	0.156164
Os03g0235700	novel.360	0.156124
Os03g0235700	Os03g0655100	0.156086
Os03g0235700	Os03g0643250	0.15597
Os03g0235700	novel.783	0.155631
Os03g0235700	Os03g0277700	0.155457
Os03g0235700	Os05g0435400	0.155451
Os03g0235700	Os10g0456800	0.155068
Os03g0235700	Os06g0681000	0.155012
Os03g0235700	Os10g0538600	0.154898
Os03g0235700	Os03g0608700	0.154826
Os03g0235700	Os05g0344200	0.154701
Os03g0235700	Os08g0128000	0.154473
Os03g0235700	Os11g0498600	0.154458
Os03g0235700	Os08g0544900	0.154163
Os03g0235700	Os12g0579450	0.154065
Os03g0235700	Os12g0272500	0.154043
Os03g0235700	Os12g0138050	0.15383
Os10g0112500	Os12g0410150	0.258322
Os10g0112500	Os11g0539800	0.258225
Os10g0112500	novel.330	0.255454
Os10g0112500	novel.28	0.246283
Os10g0112500	Os12g0236400	0.237101
Os10g0112500	Os11g0551800	0.233887
Os10g0112500	novel.997	0.227308
Os10g0112500	Os10g0553800	0.221863
Os10g0112500	novel.1008	0.220442
Os10g0112500	Os11g0602750	0.219965
Os10g0112500	Os11g0164200	0.218902
Os10g0112500	novel.565	0.217146
Os10g0112500	Os10g0320400	0.217025
Os10g0112500	Os11g0160300	0.216935
Os10g0112500	Os11g0138300	0.216796
Os10g0112500	Os12g0286600	0.216556
Os10g0112500	Os11g0543100	0.215677
Os10g0112500	Os11g0157400	0.208862
Os10g0112500	Os12g0582800	0.207018
Os10g0112500	Os10g0155500	0.204477
Os10g0112500	Os10g0535600	0.202818
Os10g0112500	novel.467	0.201889
Os10g0112500	Os12g0442800	0.197324
Os10g0112500	novel.1103	0.195847
Os10g0112500	Os10g0161400	0.193921
Os10g0112500	Os11g0648100	0.193723
Os10g0112500	Os11g0102700	0.192668
Os10g0112500	novel.1019	0.190935
Os10g0112500	Os11g0139900	0.190564
Os10g0112500	Os12g0579450	0.189868
Os10g0112500	novel.785	0.189846
Os10g0112500	Os10g0541200	0.189227
Os10g0112500	Os10g0407000	0.189169
Os10g0112500	Os11g0155600	0.188665
Os10g0112500	novel.903	0.188202
Os10g0112500	novel.256	0.186576
Os10g0112500	novel.777	0.186553
Os10g0112500	Os10g0535800	0.185337
Os10g0112500	novel.889	0.185256
Os10g0112500	novel.20	0.18423
Os10g0112500	Os12g0615500	0.18368
Os10g0112500	Os11g0157600	0.183334
Os10g0112500	Os11g0245800	0.183317
Os10g0112500	Os10g0548100	0.183221
Os10g0112500	novel.1080	0.183067
Os10g0112500	Os10g0539200	0.183026
Os10g0112500	novel.1028	0.182797
Os10g0112500	Os11g0126100	0.18095
Os10g0112500	Os12g0157200	0.180399
Os10g0112500	Os11g0212000	0.179666
Os10g0112500	novel.619	0.178567
Os10g0112500	Os11g0276300	0.177756
Os10g0112500	Os11g0428800	0.177301
Os10g0112500	Os11g0524601	0.176697
Os10g0112500	novel.159	0.176454
Os10g0112500	Os12g0126300	0.17512
Os10g0112500	Os12g0138050	0.174876
Os10g0112500	Os12g0134200	0.174051
Os10g0112500	Os10g0471300	0.173834
Os10g0112500	Os11g0127700	0.172735
Os10g0112500	Os10g0546900	0.17239
Os10g0112500	Os11g0666000	0.172002
Os10g0112500	Os10g0184300	0.171755
Os10g0112500	novel.44	0.171353
Os10g0112500	novel.1010	0.171038
Novel represents a newly discovered gene
