# Supplementary material for: Transcriptome and Co-Expression Network Analysis Reveals the Molecular Mechanism of Rice Root Systems in Response to Low-Nitrogen Conditions
Source: Int J Mol Sci. 2023 Mar 9;24(6):5290. doi: 10.3390/ijms24065290 (PMC10048922; doi:10.3390/ijms24065290)
Supplement: Supplementary file 1 [file ijms-24-05290-s001.zip › Supplementary Table S8.xlsx]

## Sheet: Sheet1
Supplementary Table S8. The candidate genes in the co-expression network.
Module	Gene ID	Gene symbols	Gene annotation	Co expressed gene
Brown	Os02g0734400	NA	Caleosin related protein	OsNRT2.4
Brown	Os03g0195800	OsSultr1;1	Sulfate transporter protein	OsNRT2.1, OsNRT2.2
Brown	Os03g0701400	NA	Tetratricopeptide-like helical	OsNRT2.4
Brown	Os04g0120300	OsSub33	OsSub33 - Putative Subtilisin homologue	OsNRT2.4
Brown	Os04g0142400	NA	Expressed protein	OsNRT2.4
Brown	Os04g0475600	DAO	Auxin oxidase gene	OsNRT2.4
Brown	Os04g0585900	OsFLZ13	DUF581 domain-containing protein	OsNRT2.4
Brown	Os04g0632100	OsRLCK163	Kinase	OsNRT2.4
Brown	Os05g0145100	NA	Expressed protein	OsNRT2.4
Brown	Os05g0434800	NA	Expressed protein	OsNRT2.4
Brown	Os06g0177000	NA	Cytochrome b-c1 complex subunit 8	OsNRT2.1, OsNRT2.2
Brown	Os06g0522300	prx81	Peroxidase precursor	OsNRT2.1, OsNRT2.2
Brown	Os09g0339000	NA	Cysteine-rich receptor-like protein kinase 25 precursor	OsNRT2.4
Brown	Os09g0471000	NA	2-aminoethanethiol dioxygenase	OsNRT2.4
Brown	Os09g0501100	NA	The protein of unknown function DUF568 domain-containing protein	OsNRT2.4
Brown	Os12g0134900	OsCYP94D5b	Cytochrome P450	OsNRT2.4
Brown	Os12g0154800	OsGLP12-2	Cupin domain-containing protein	OsNRT2.1, OsNRT2.2
Brown	Os12g0154900	OsGLP12-3	Cupin domain-containing protein	OsNRT2.1, OsNRT2.2
Brown	Os12g0478200	OsABA45	GRAM domain-containing protein	OsNRT2.4
Brown	Os12g0594000	OsWD40-198	WD-40 repeat family protein	OsNRT2.4
Black	Os01g0944100	NA	Expressed protein	Os01g0902800
Black	Os01g0965900	NA	Expressed protein	Os01g0960900
Black	Os03g0282100	OsABCG6	White-brown complex homolog protein	OsNPF4.5,Os01g0902800
Black	Os03g0305400	OsUSP17	Universal stress protein domain-containing protein	Os01g0902800,Os03g0235700
Black	Os03g0341000	OsERF66	AP2 domain containing protein	Os01g0902800,Os01g0960900,Os03g0235700
Black	Os03g0426300	OsRLCK113	Cysteine-rich receptor-like protein kinase 28 precursor	Os01g0960900,Os03g0235700
Black	Os03g0654900	NA	Expressed protein	Os01g0902800,Os03g0235700
Black	Os03g0766600	NA	Expressed protein	OsNPF4.5,Os01g0902800
Black	Os04g0476000	OsFBO17	OsFBO17 - F-box and other domains containing protein	Os01g0960900,Os03g0235700
Black	Os04g0481800	NA	O-acyltransferase	OsNPF4.5,Os01g0902800
Black	Os04g0585900	OsFLZ13	DUF581 domain containing protein	Os01g0960900,Os03g0235700
Black	Os04g0619000	ONAC83	No apical meristem protein	Os01g0960900,Os03g0235700
Black	Os04g0674400	OsDRE2a	Regulation of chitin-induced immune responses	Os01g0902800,Os01g0960900,Os03g0235700
Black	Os06g0662550	NA	Retrotransposon protein，Ty3-gypsy subclass	Os01g0902800
Black	Os07g0190800	OsTRXh5	Thioredoxin	Os01g0902800,Os01g0960900,Os03g0235700
Black	Os08g0428100	OsFbox445	F-box domain containing protein	Os01g0960900,Os03g0235700
Black	Os08g0480400	NA	2-aminoethanethiol dioxygenase	OsNPF4.5,Os01g0902800
Black	Os08g0533300	NA	Accumulation and replication of chloroplasts 5	OsNPF4.5,Os01g0902800
Black	Os10g0407200	NA	YGL010w	Os01g0902800,Os03g0235700
Black	Os11g0160300	OsWNK6	Serine/threonine-protein kinase WNK6	Os01g0902800,Os01g0960900,Os03g0235700,Os10g0112500
Black	Os11g0164200	NA	Ribosome inactivating protein	Os01g0960900,Os03g0235700,Os10g0112500
Black	Os11g0602750	NA	Conserved hypothetical protein	Os01g0960900,Os03g0235700,Os10g0112500
Black	Os12g0236400	OsAK3	Adenylate kinase	Os01g0960900,Os03g0235700,Os10g0112500
Black	Os12g0410150	NA	Hypothetical gene	Os01g0960900,Os03g0235700,Os10g0112500
