# Supplementary figures and images for: Transcriptome and Co-Expression Network Analysis Reveals the Molecular Mechanism of Rice Root Systems in Response to Low-Nitrogen Conditions
Source: MDPI journal article supplement (doi:10.3390/ijms24065290), 2023-03-09

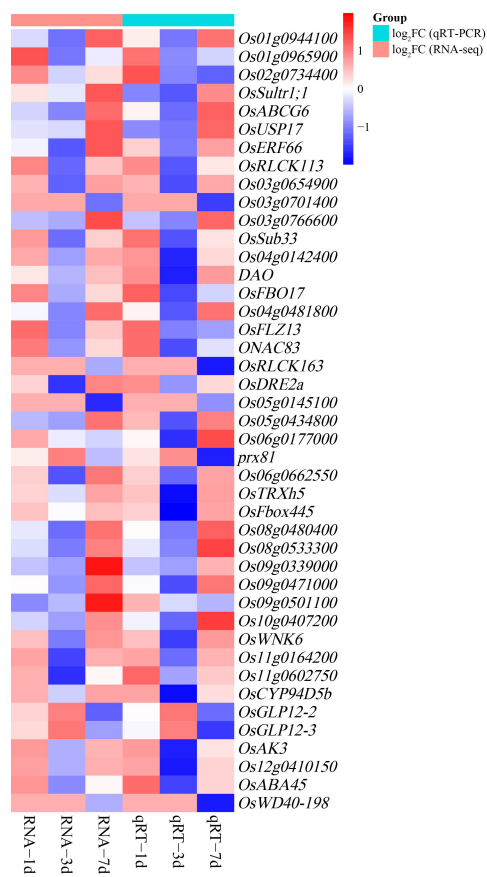

Figure S2. Correlation between RNA-seq and qRT-PCR results of candidate genes.

Supplement: s1 [file s1]
